# Supplementary material
Source: ML conference proceedings conference paper supplement (https://openaccess.thecvf.com/content/CVPR_2020/html/Li_FSS-1000_A_1000-Class_CVPR_2020_paper.html)

## Original Support

Support set

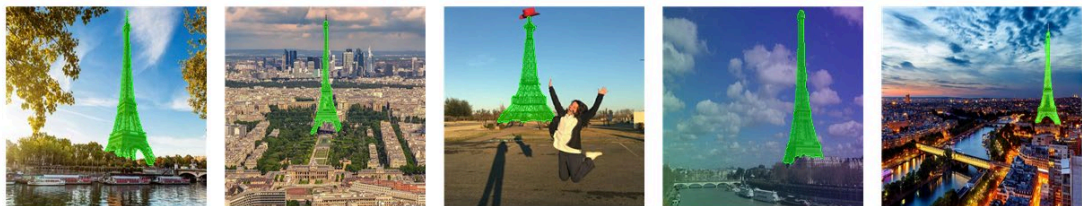

Query Set

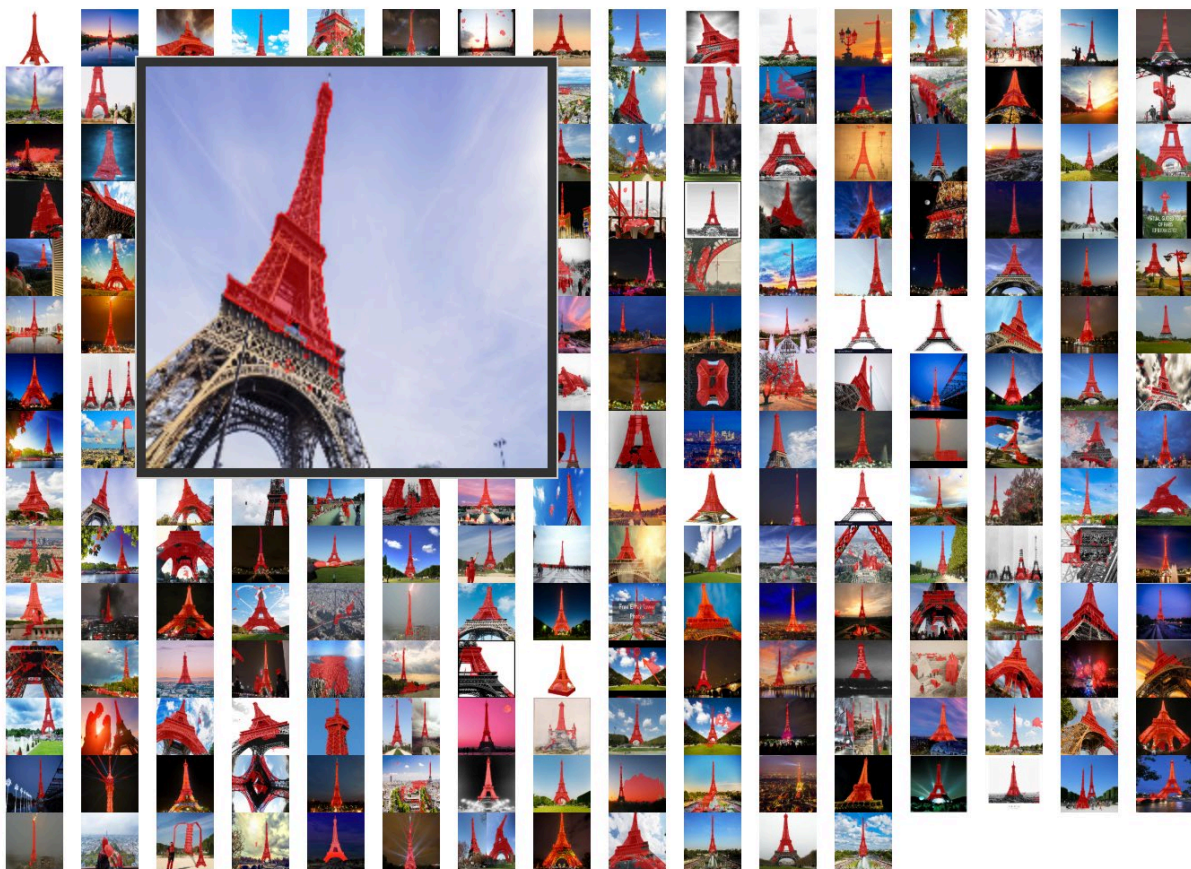

## Refined Support

Support set

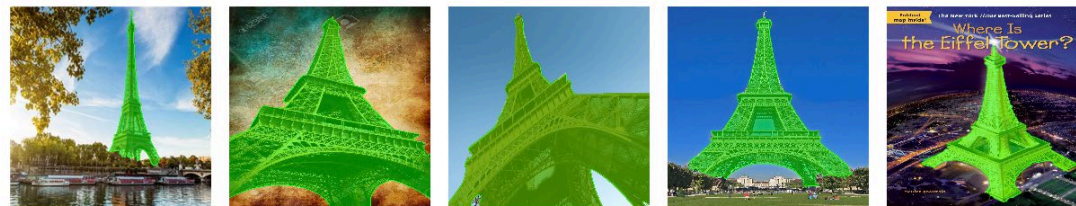

Query Set

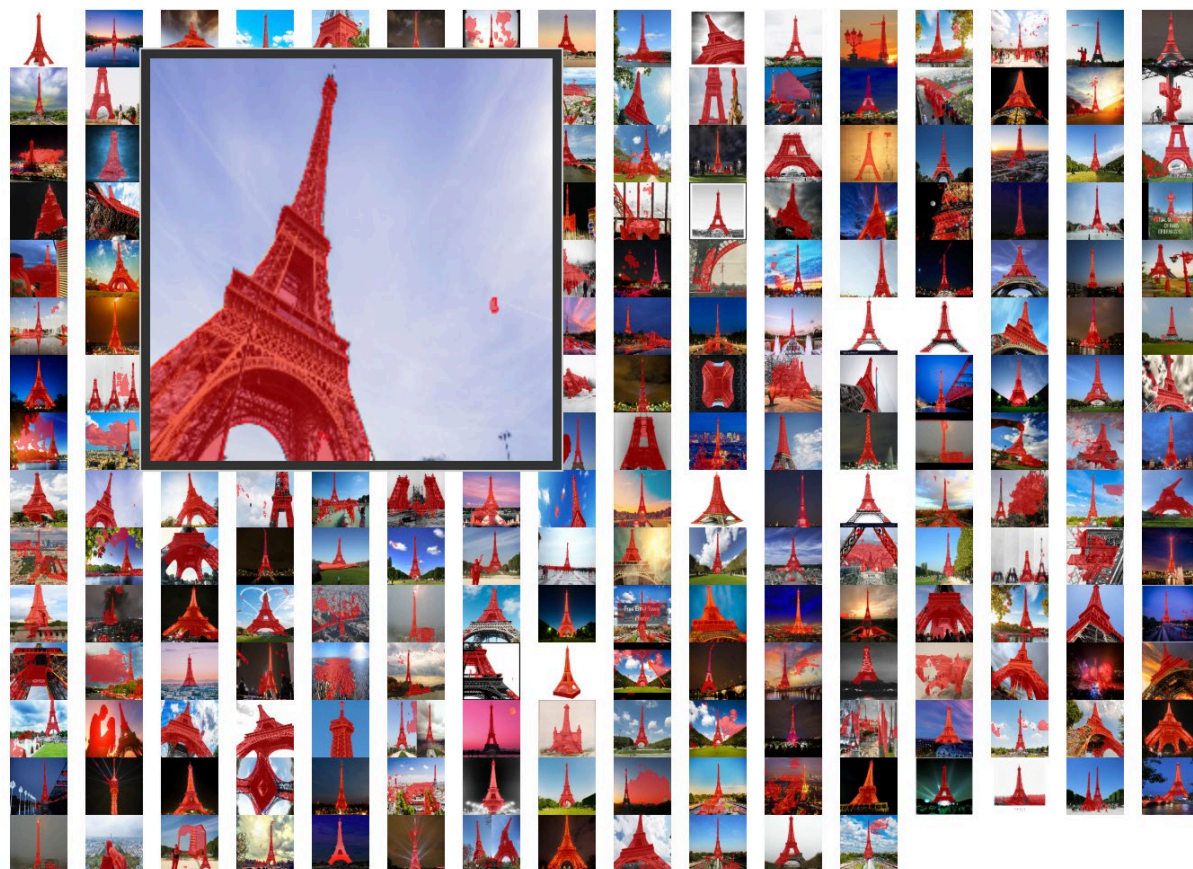



## Original Support

Support set

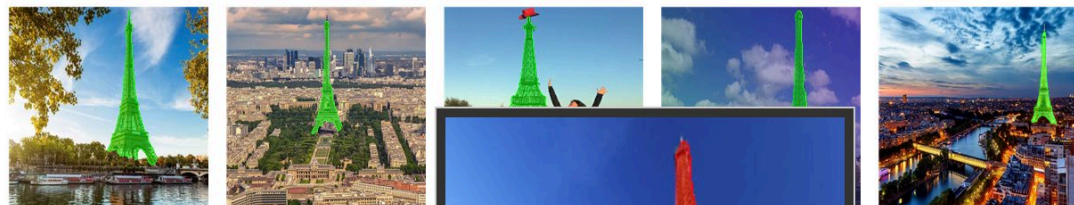

Query Set

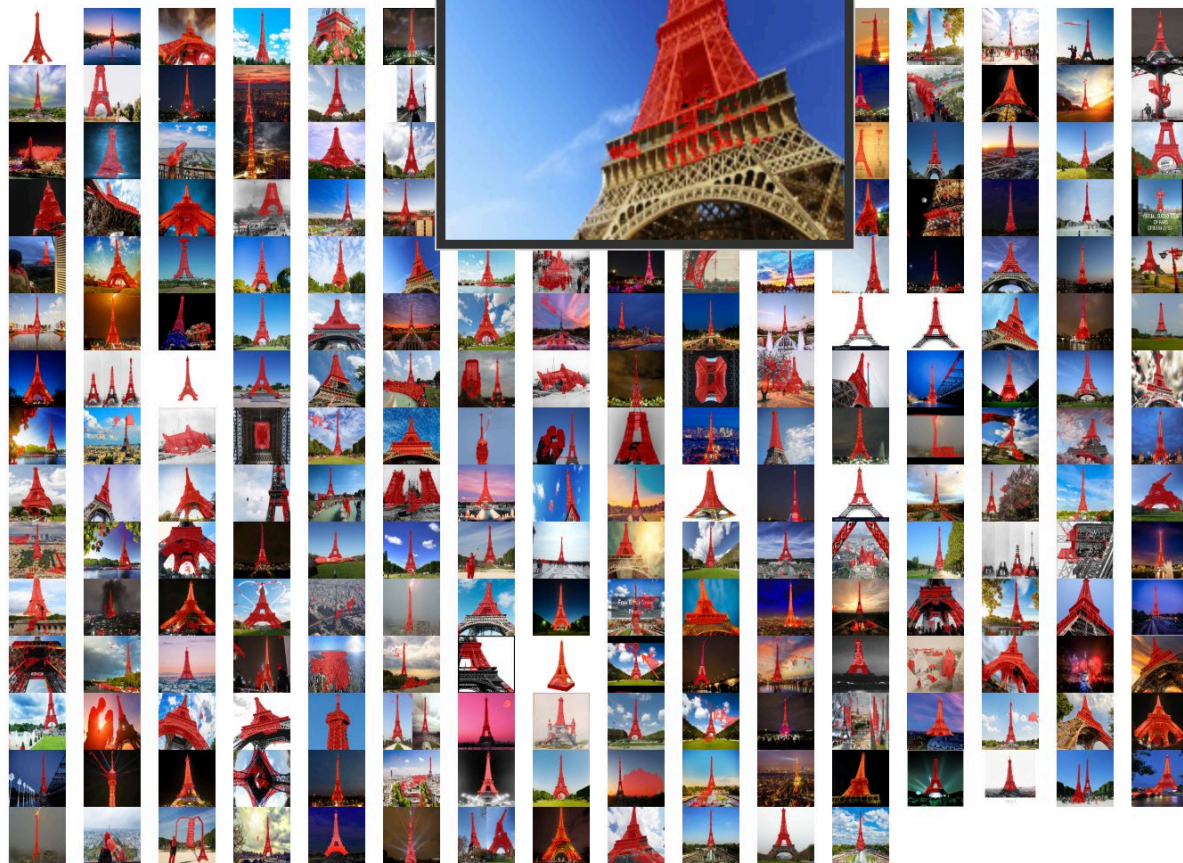

## Refined Support

Support set

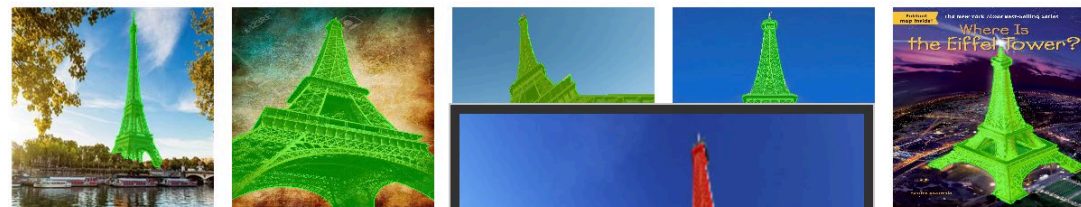

Query Set

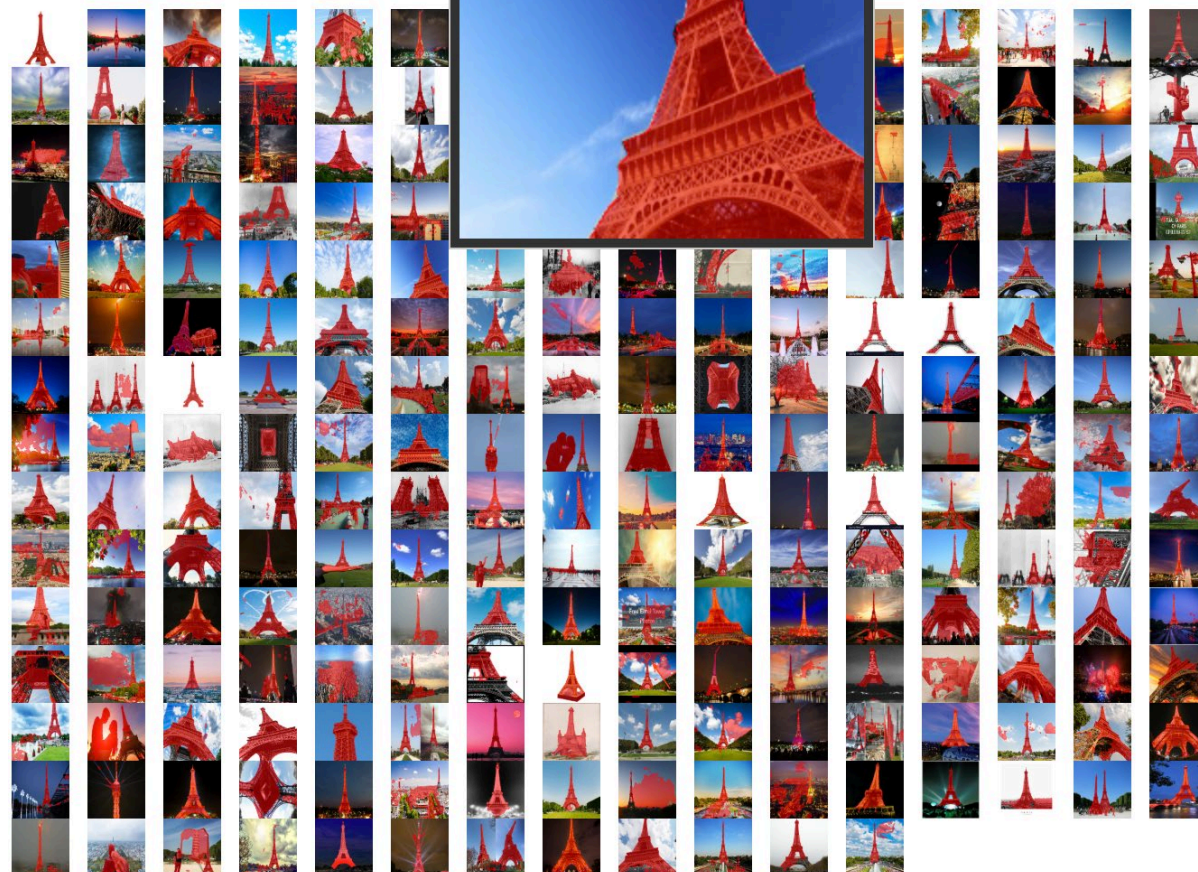



## Original Support

Support set

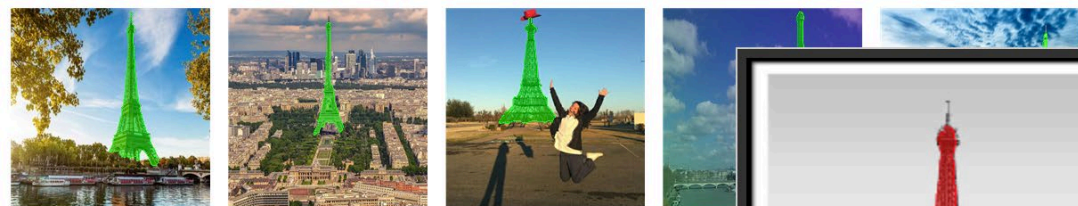

Query Set

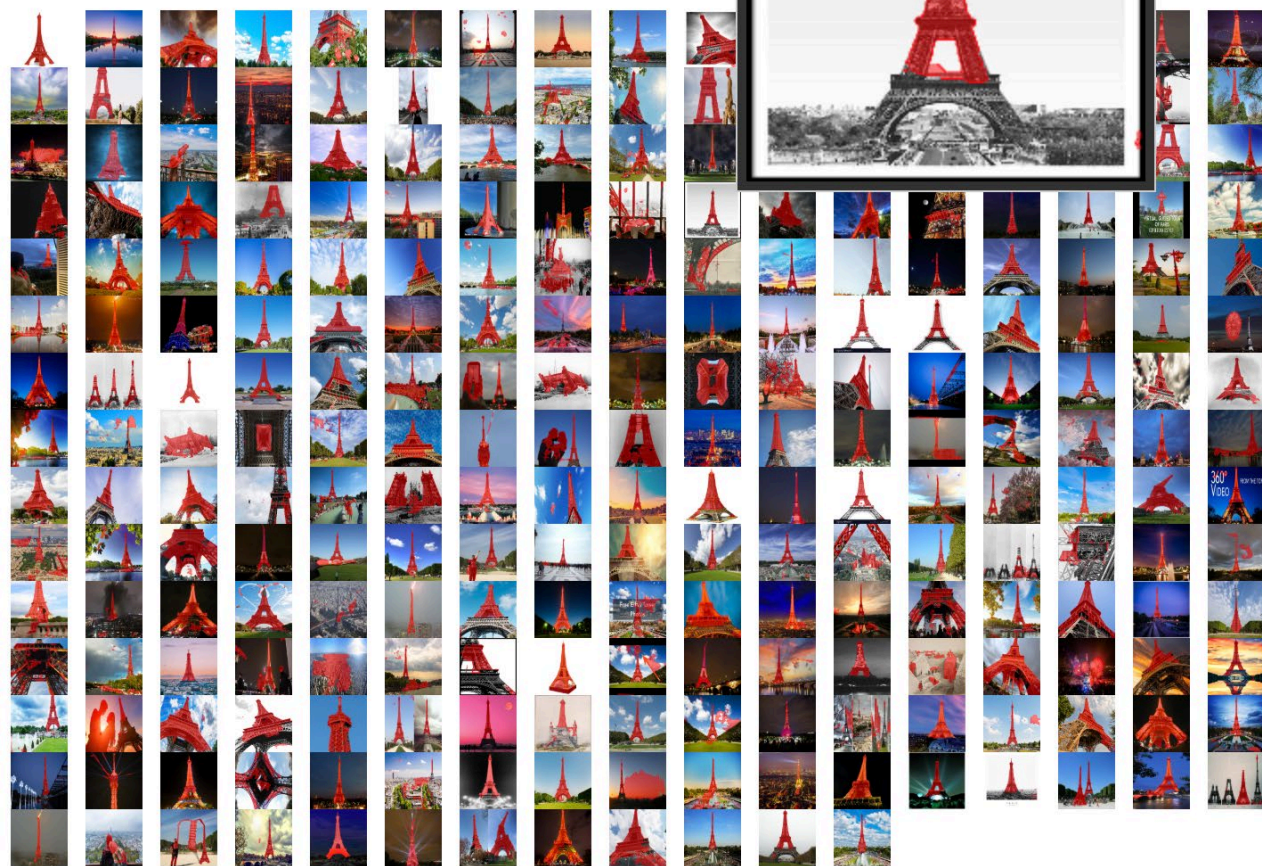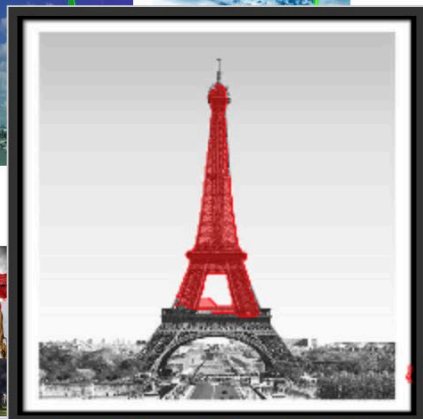

## Refined Support

Support set

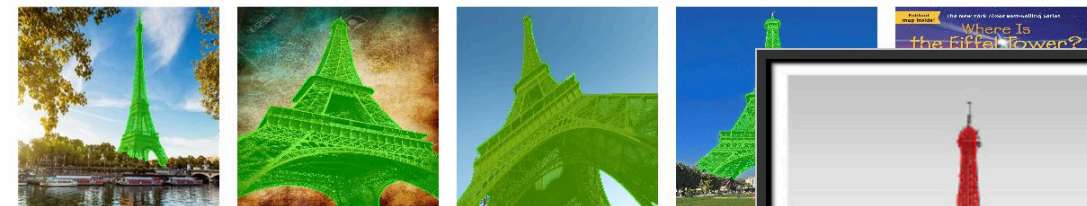

Query Set

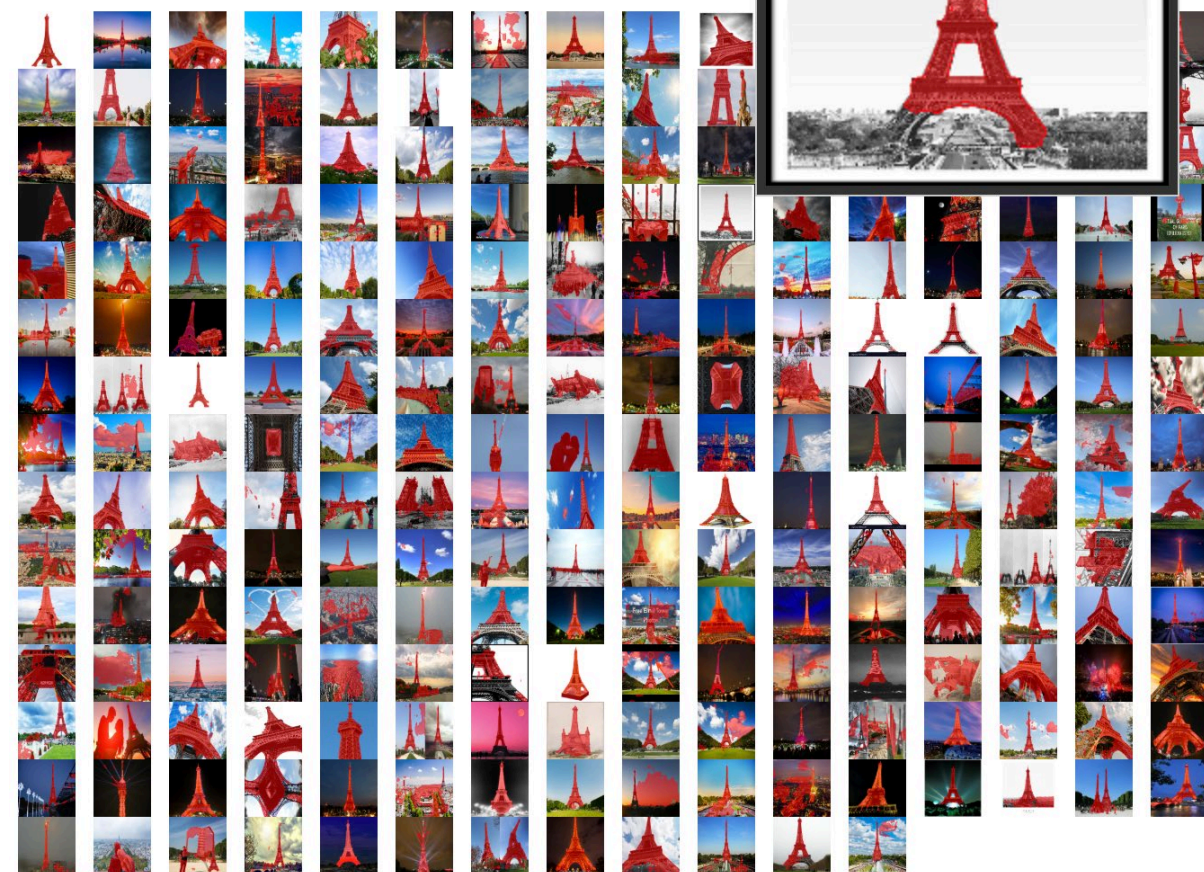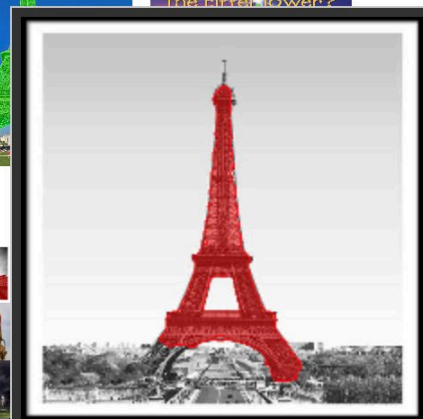



## Original Support

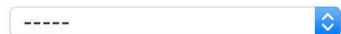

Support set

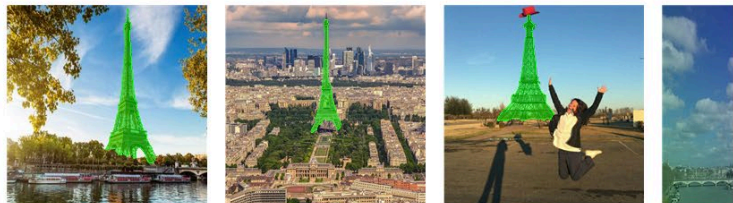

Query Set

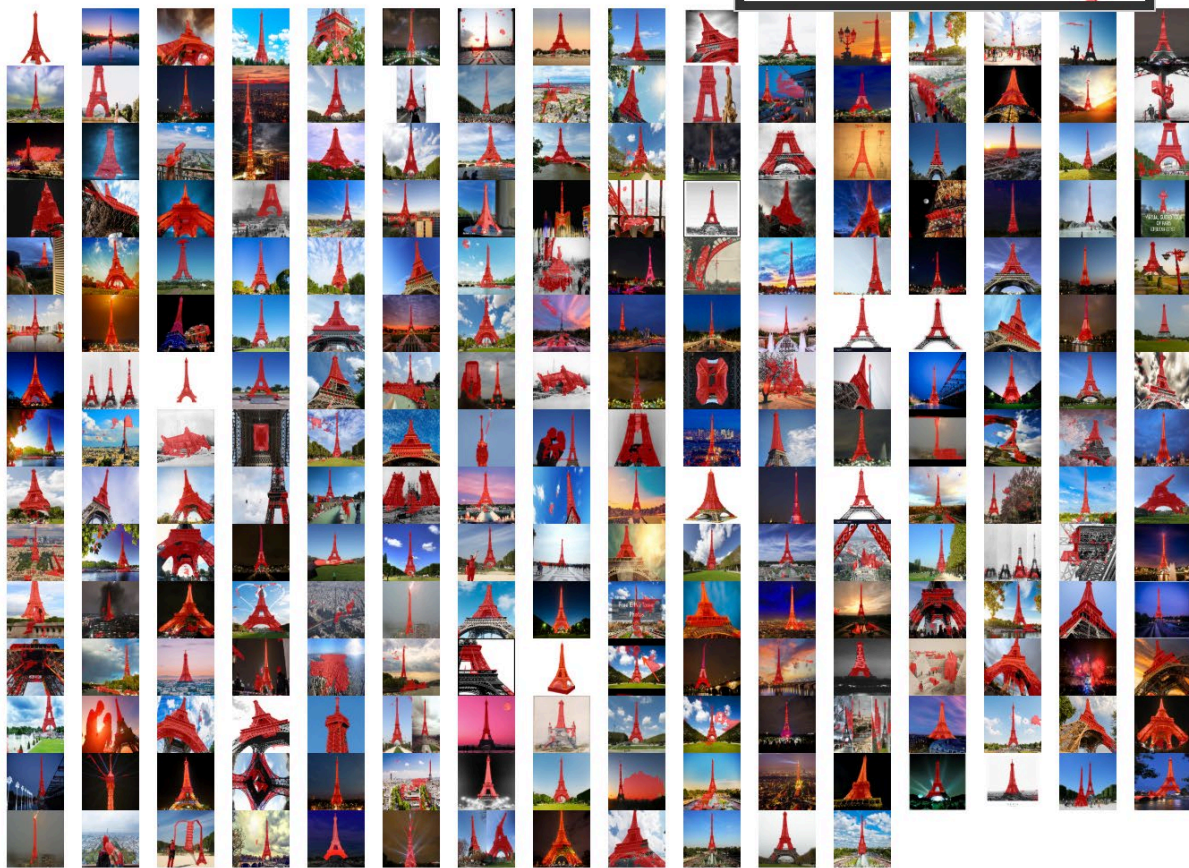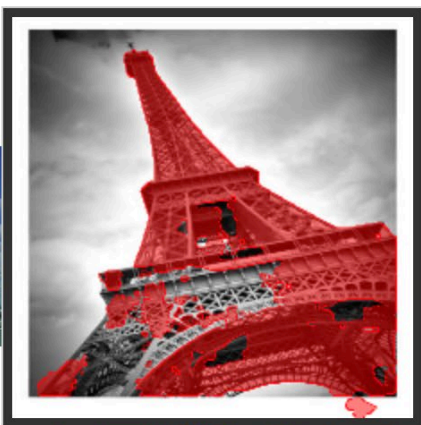

## Refined Support

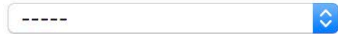

Support set

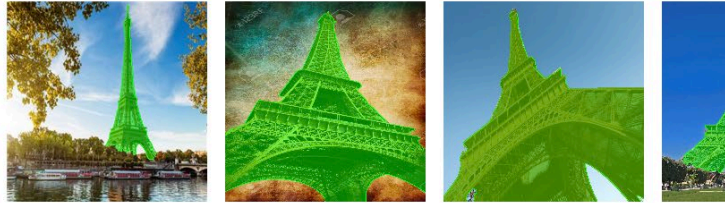

Query Set

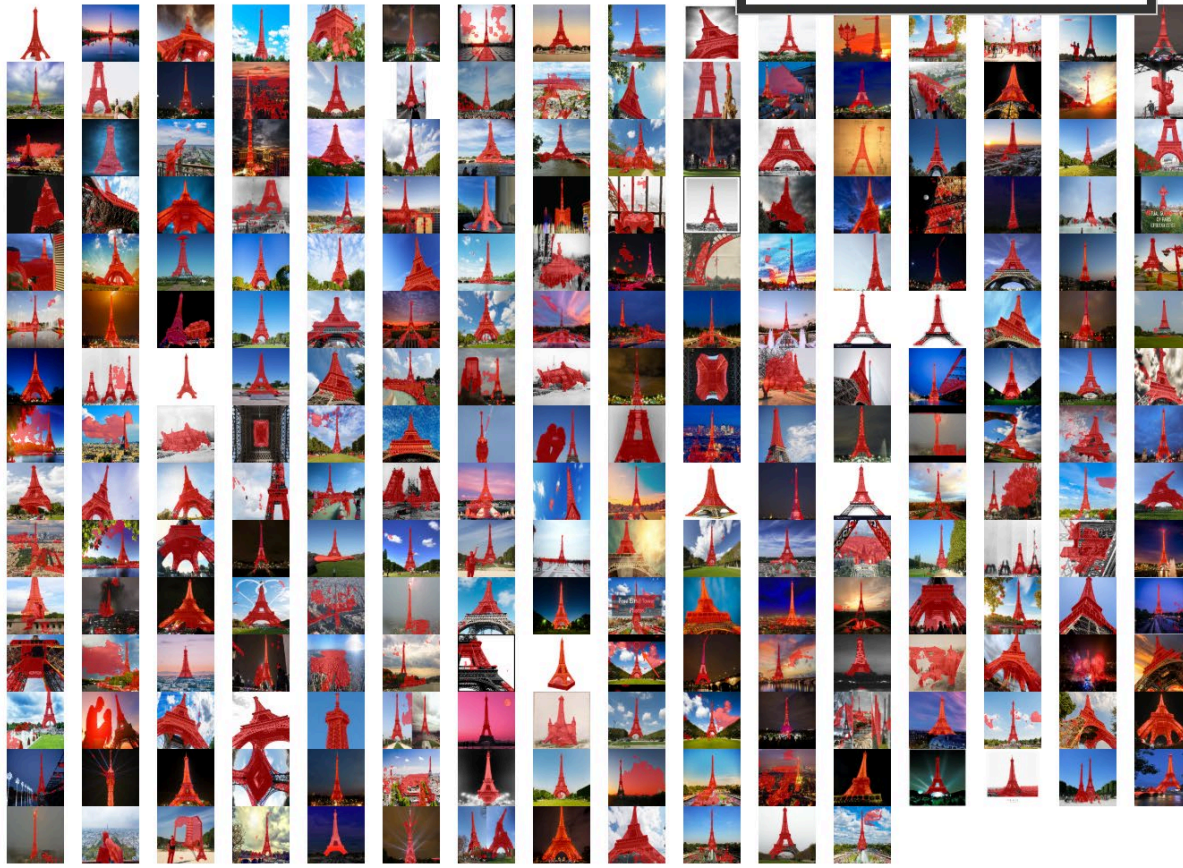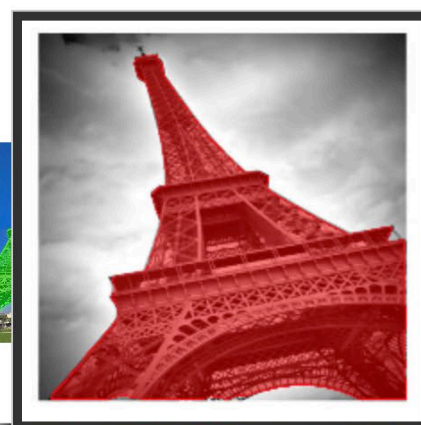



## Original Support

Support set

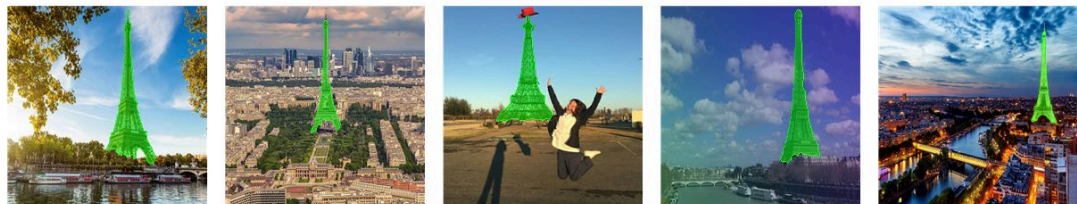

Query Set

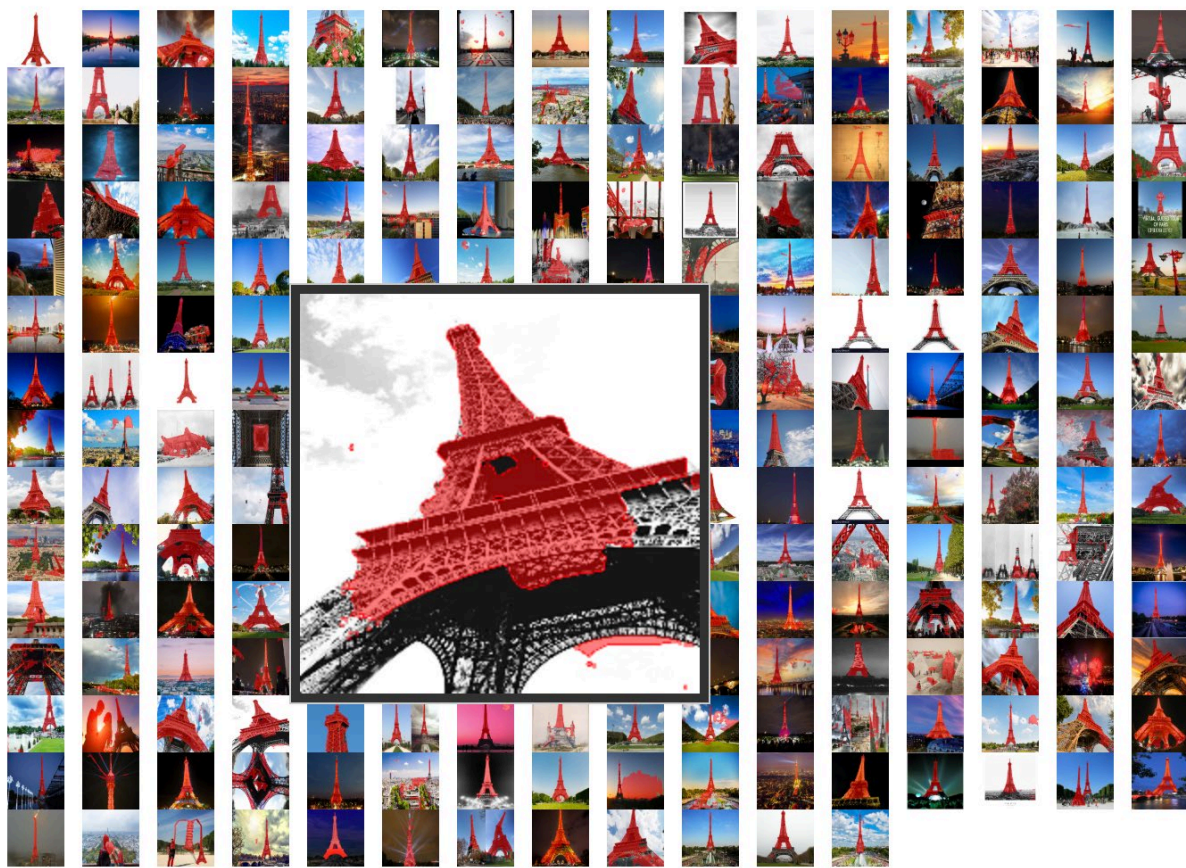

## Refined Support

Support set

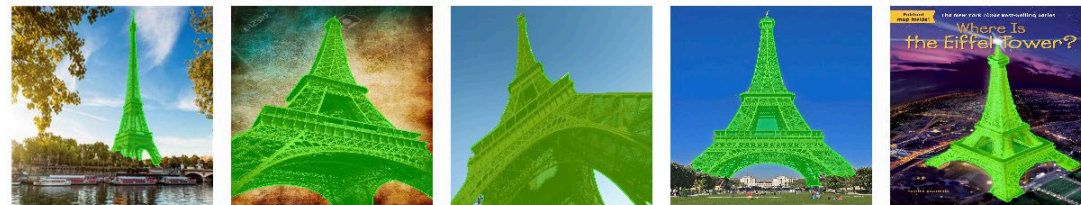

Query Set

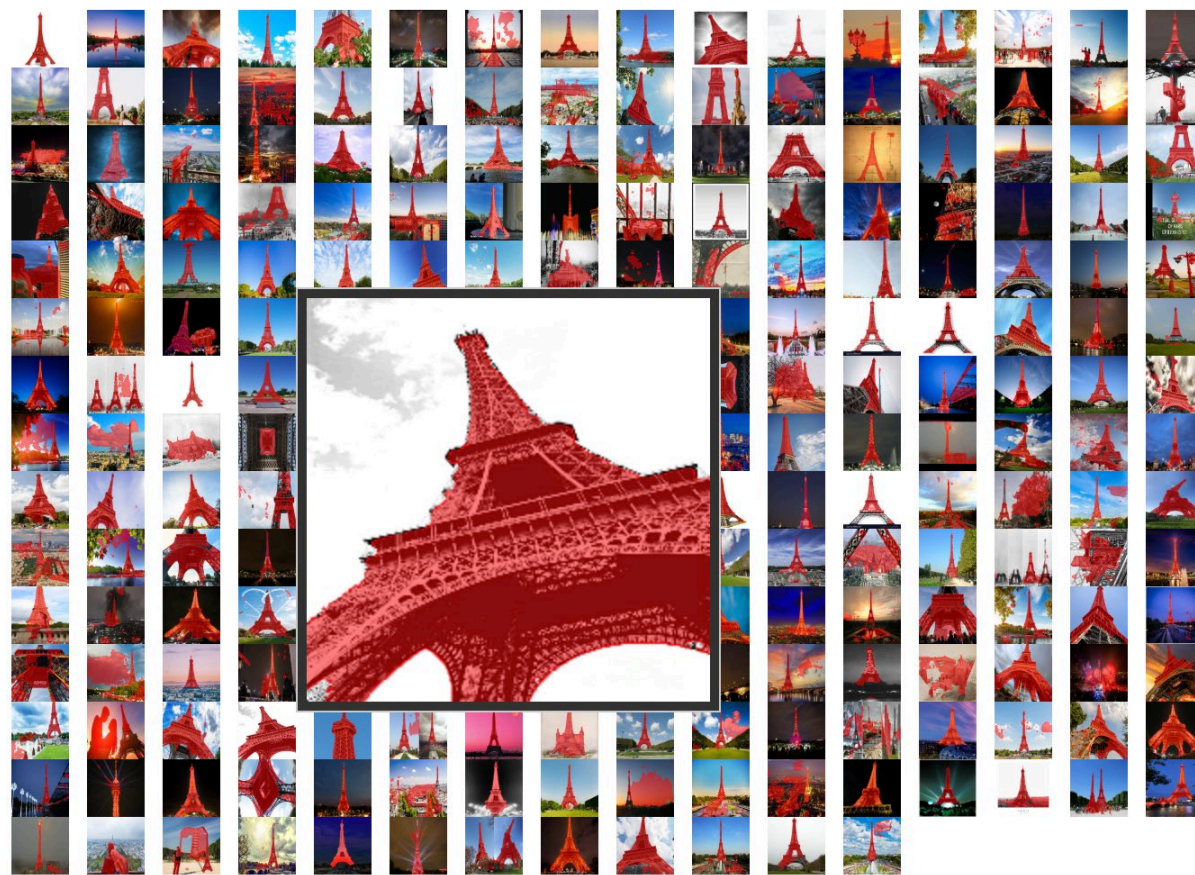



## Original Support

Support set

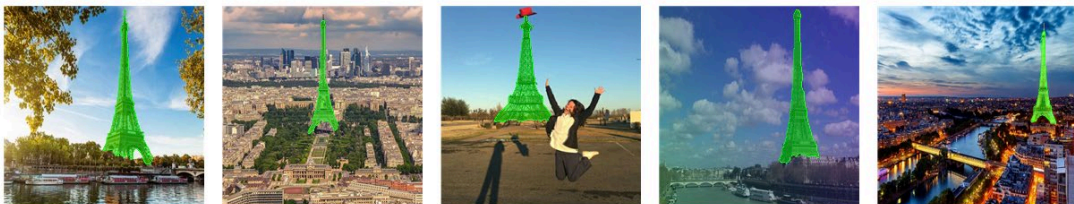

Query Set

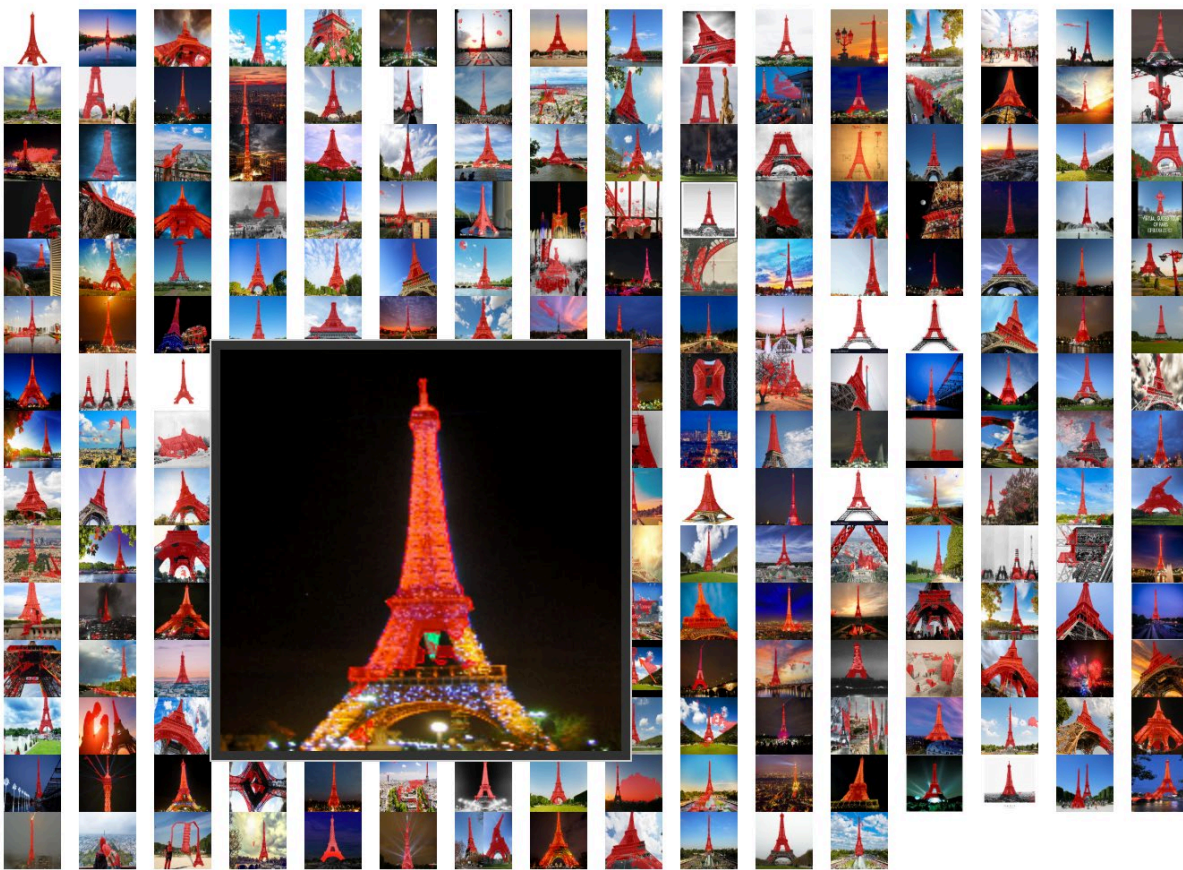

## Refined Support

Support set

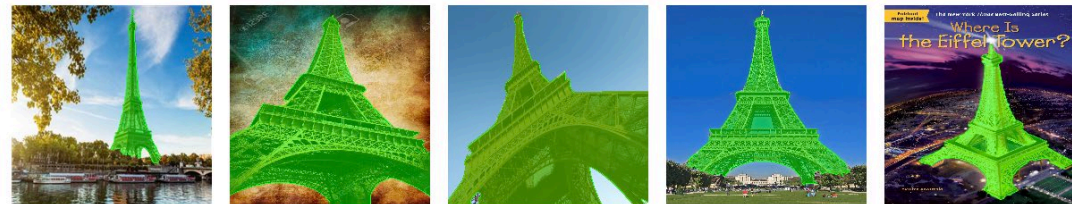

Query Set

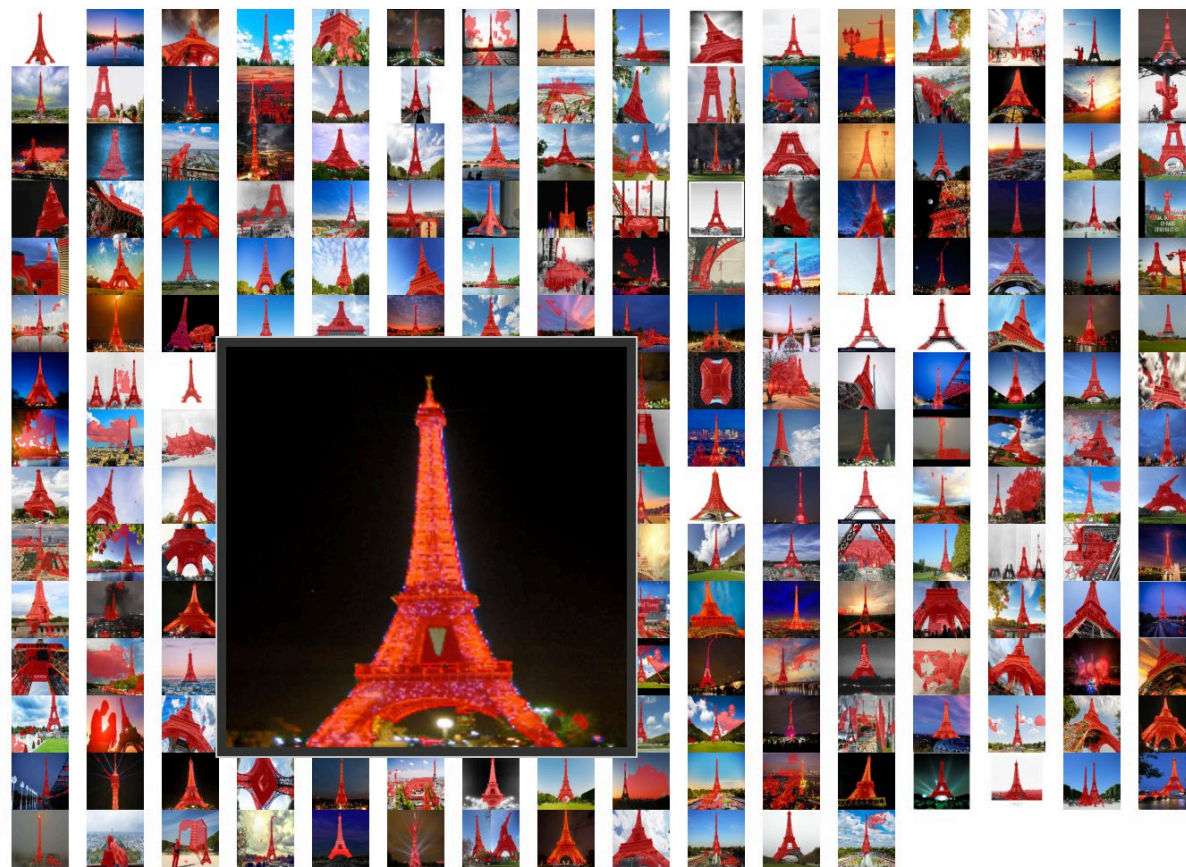



## Original Support

-----

Support set

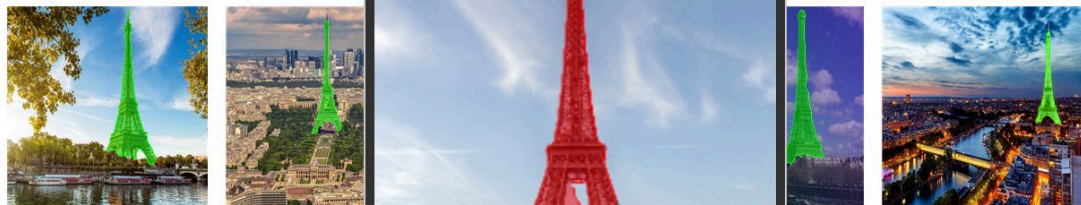

Query Set

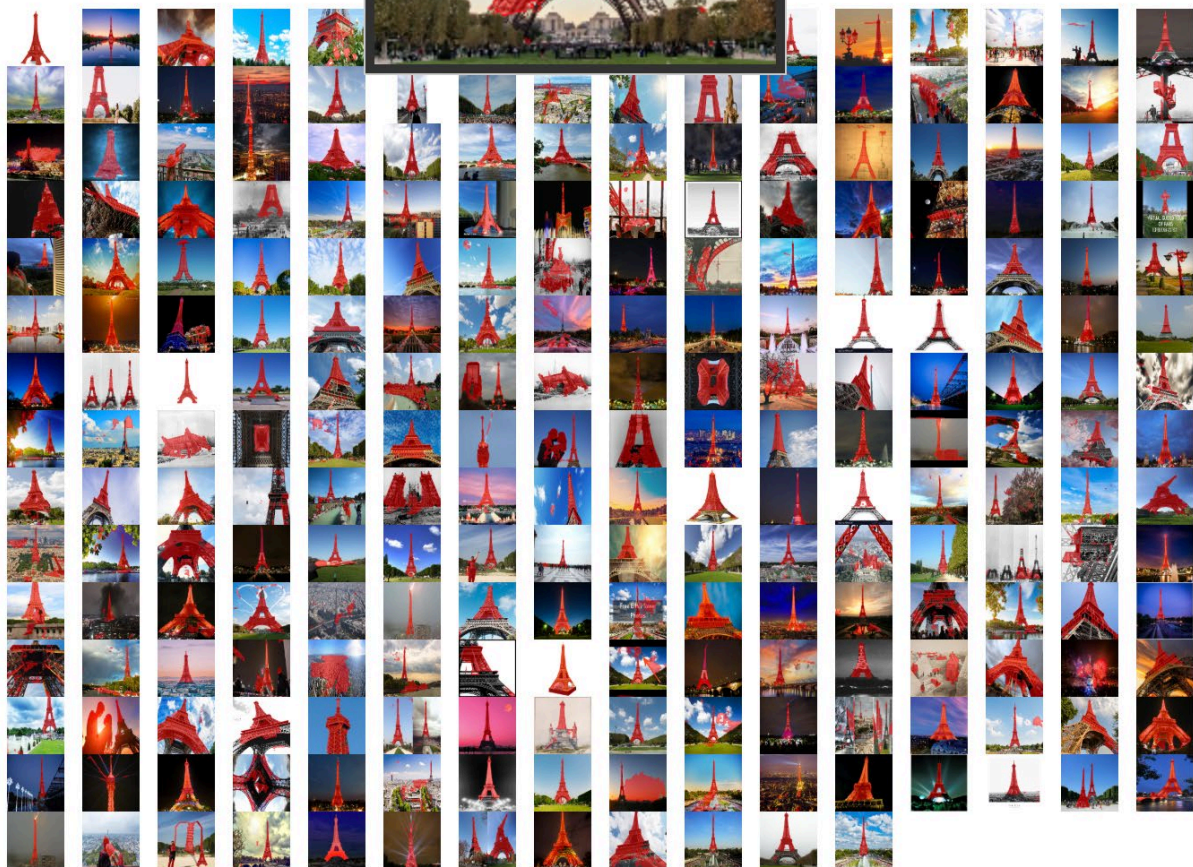

## Refined Support

-----

Support set

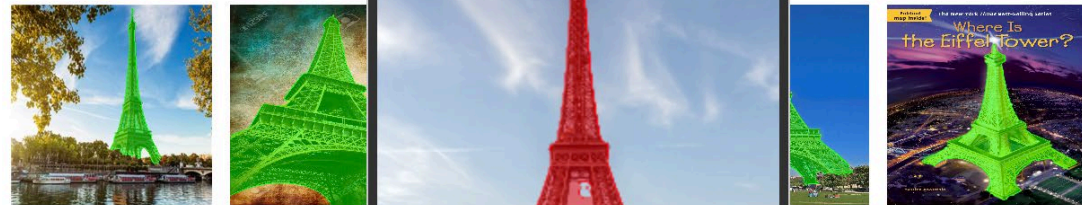

Query Set

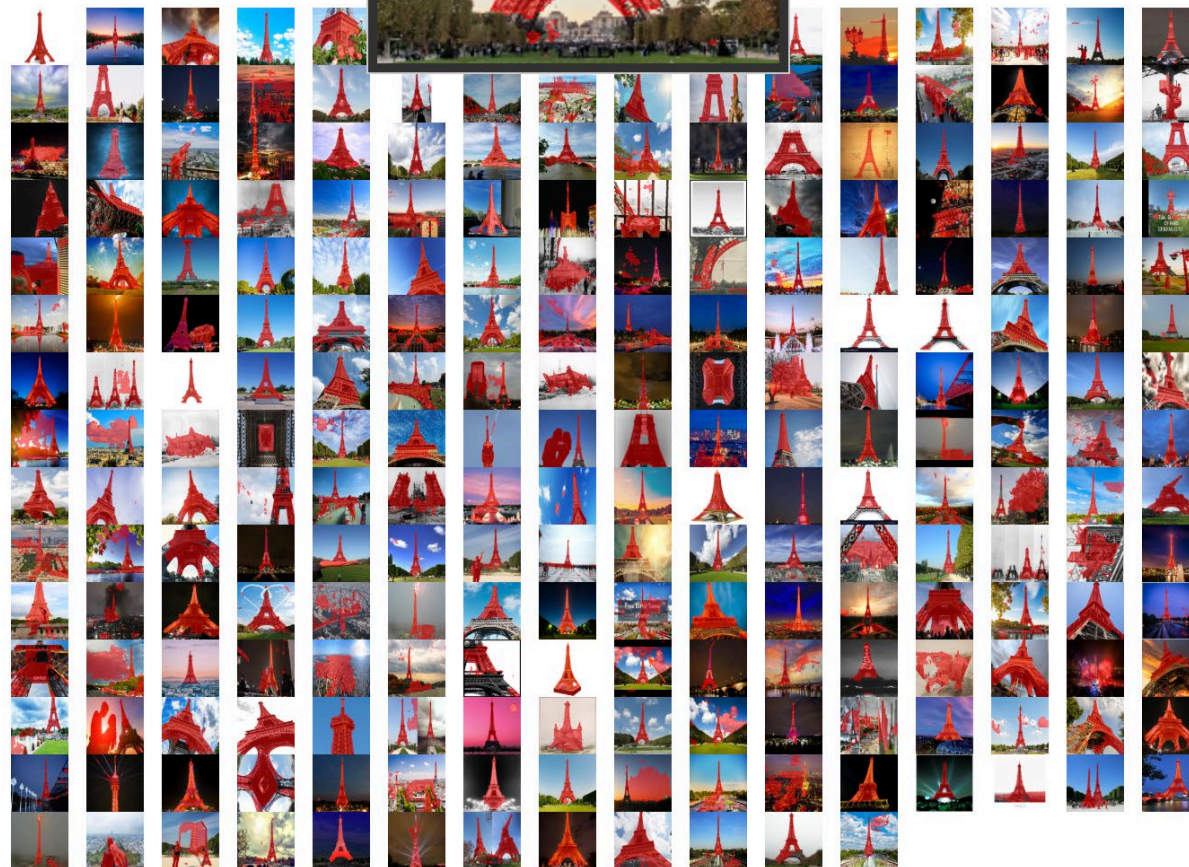



## Original Support

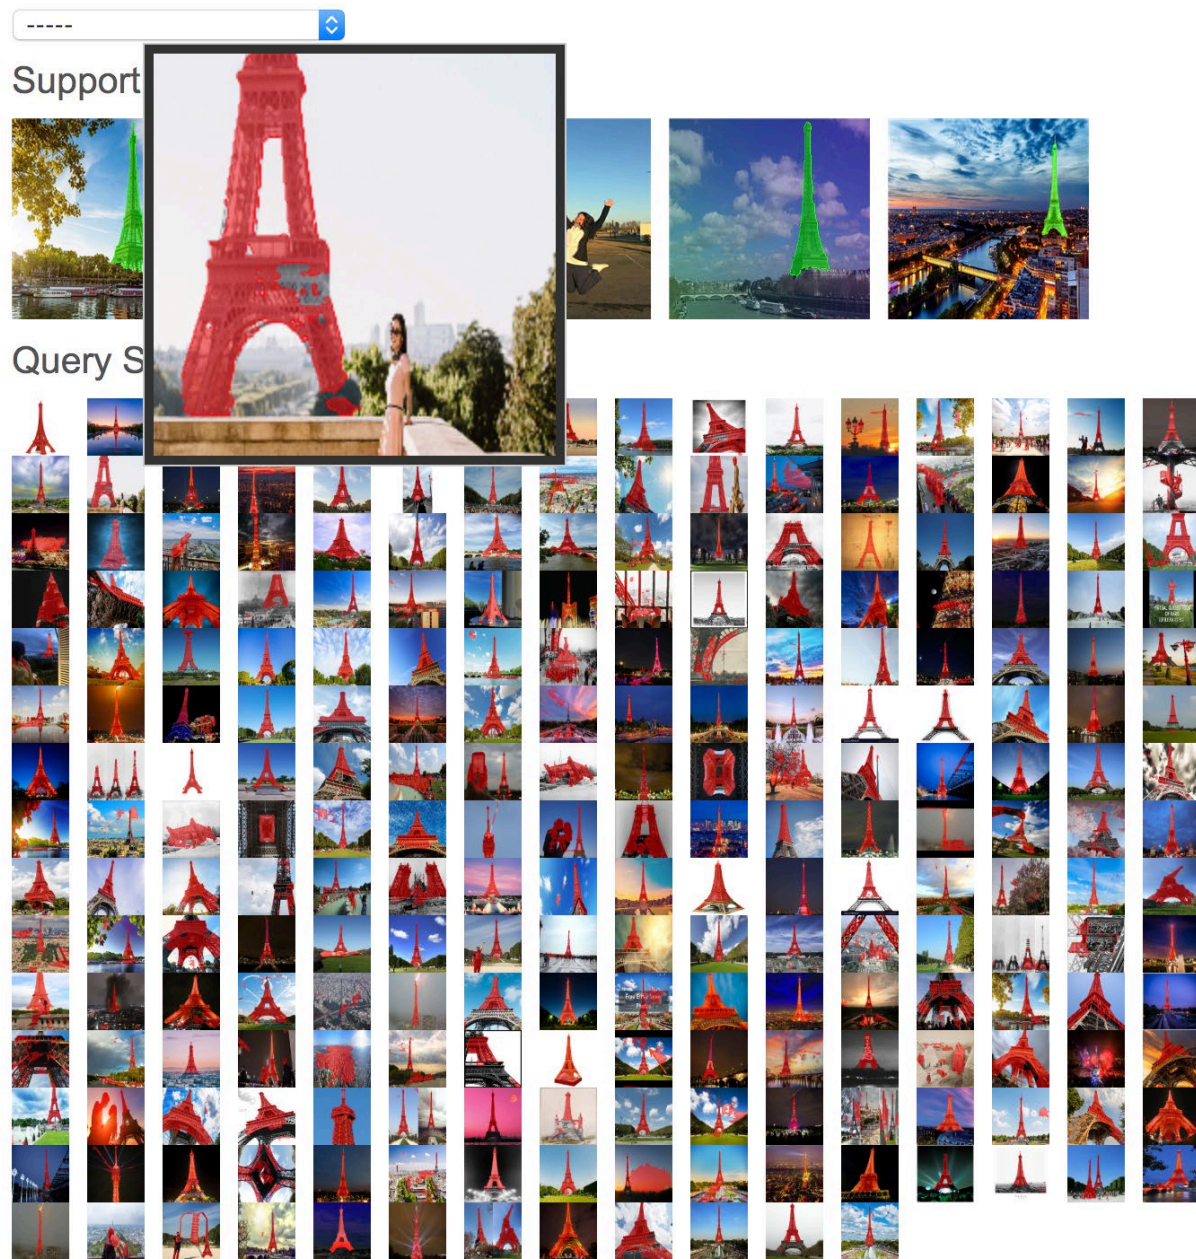

## Refined Support

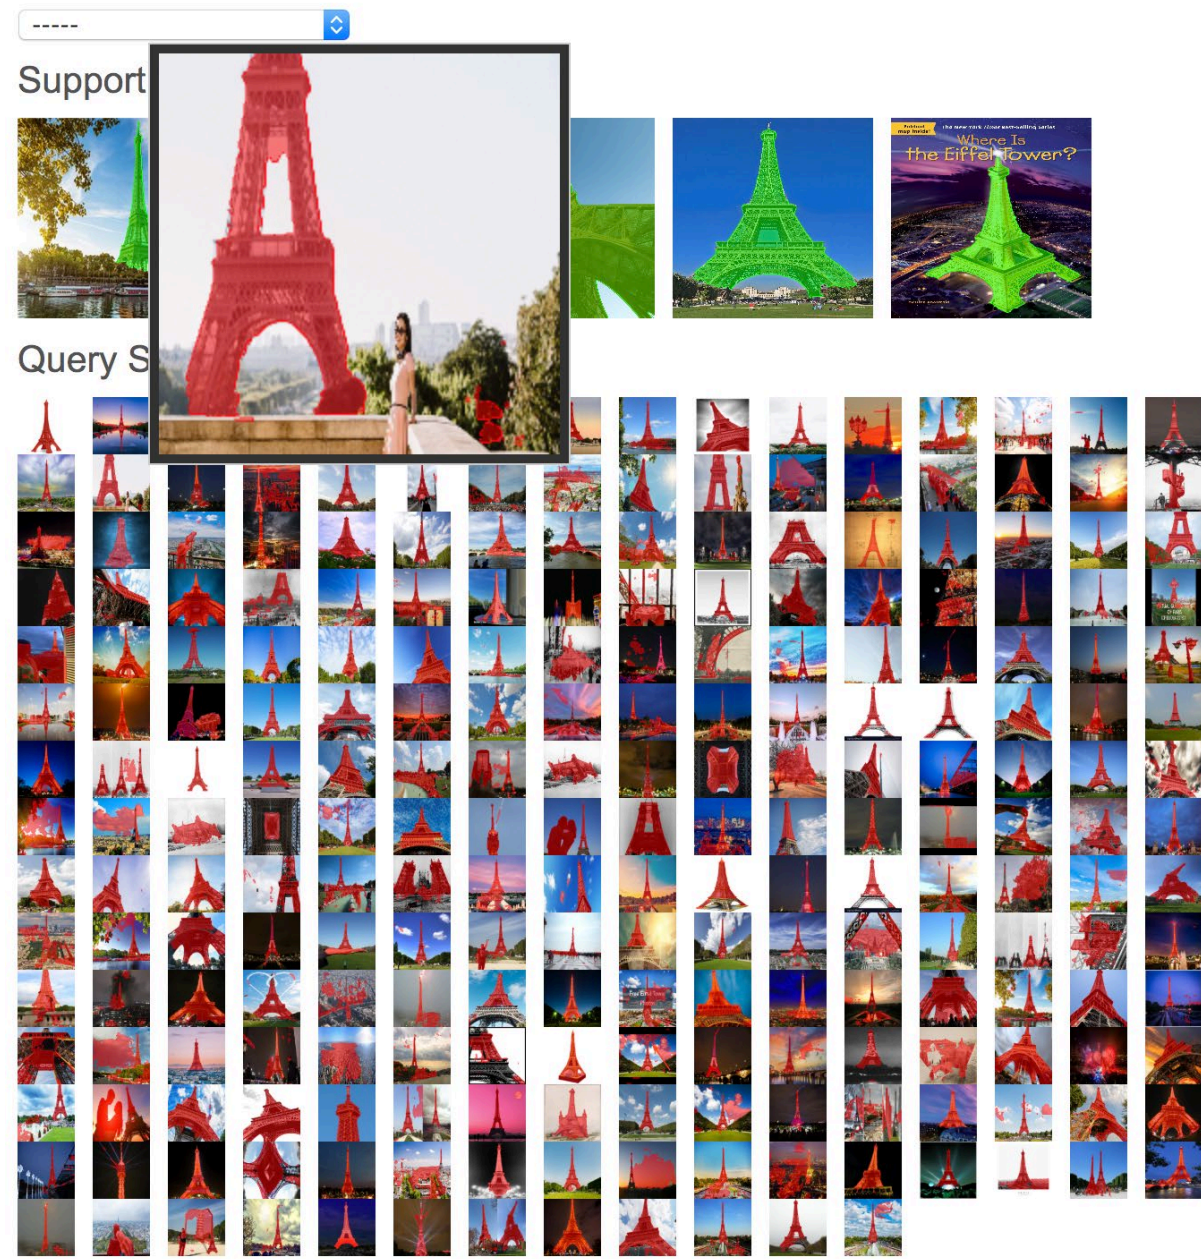



## Original Support

Support set

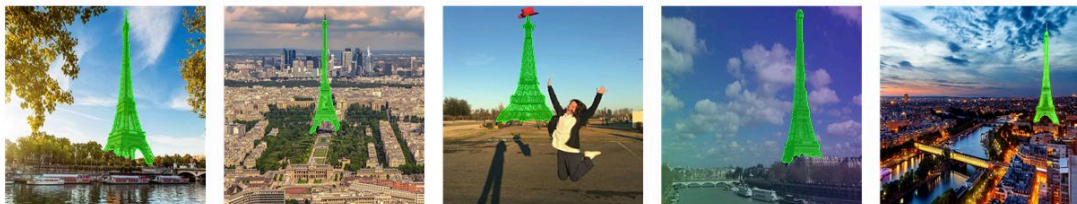

Query Set

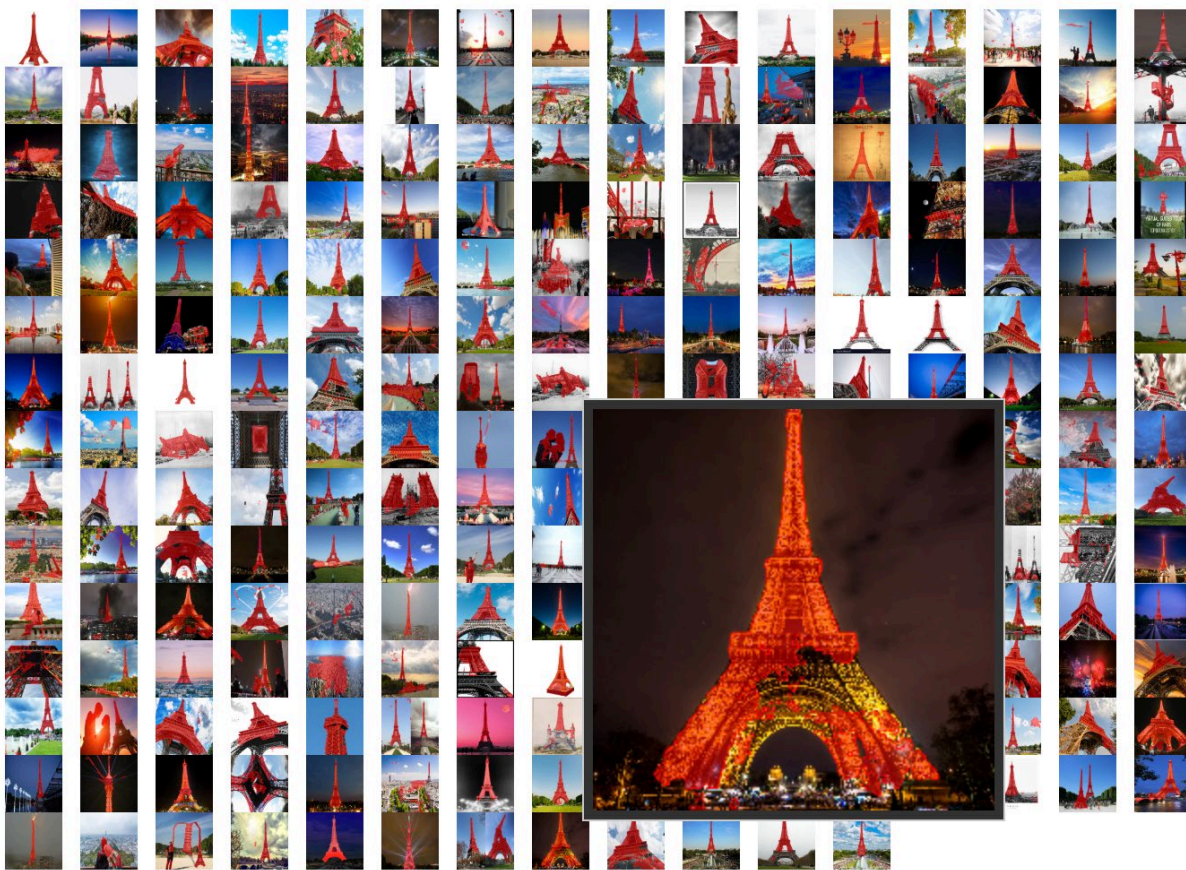

## Refined Support

Support set

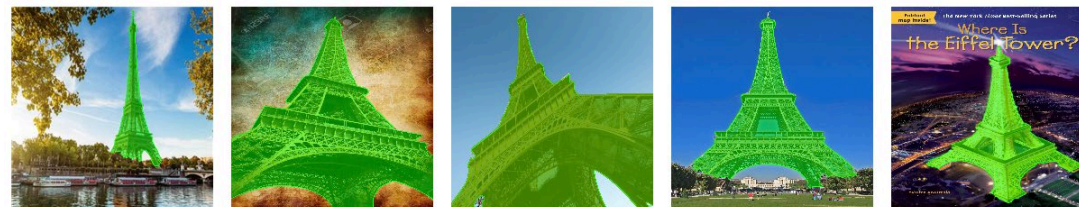

Query Set

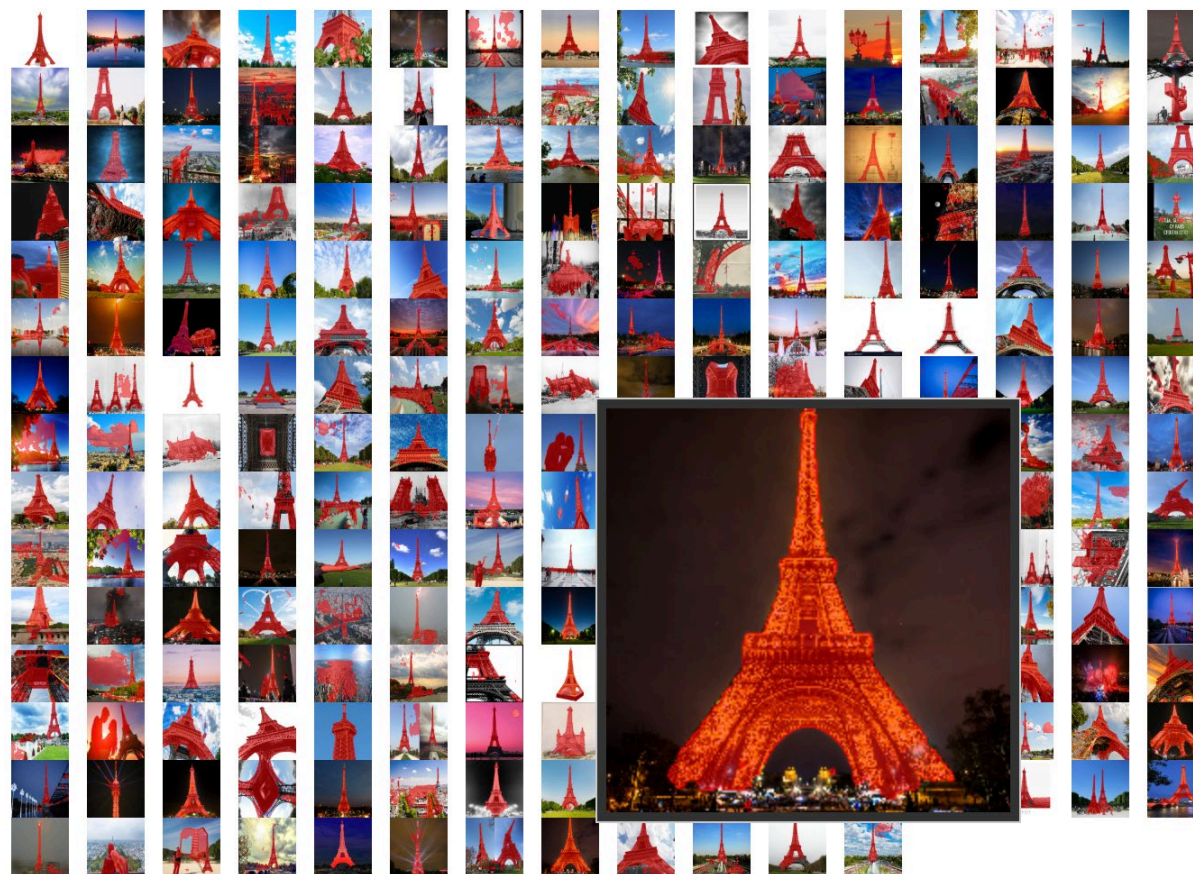



## Original Support

Support set

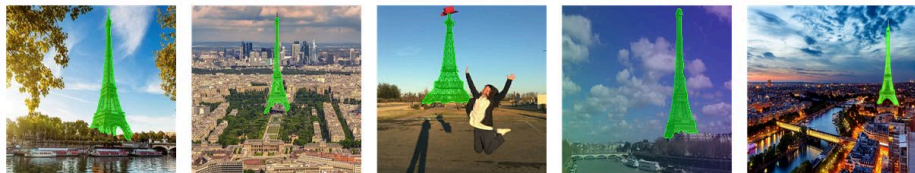

Query Set

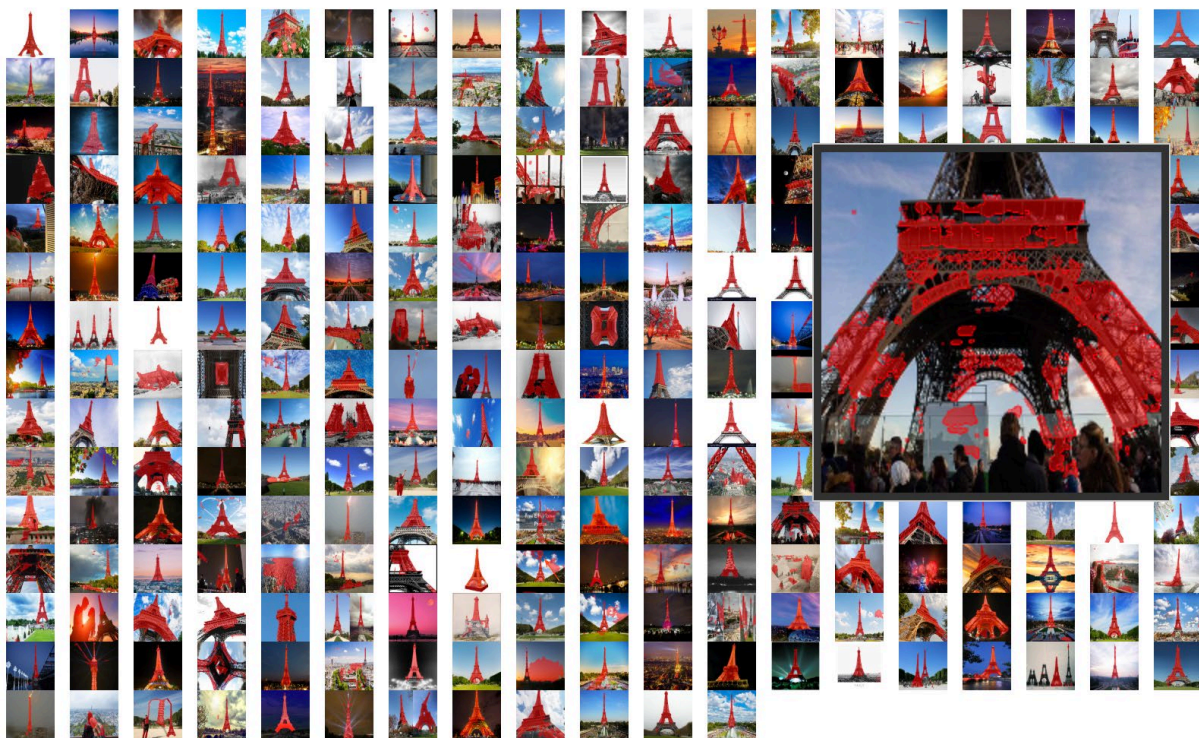

## Refined Support

Support set

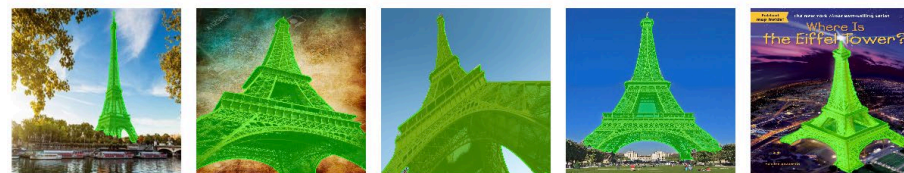

Query Set

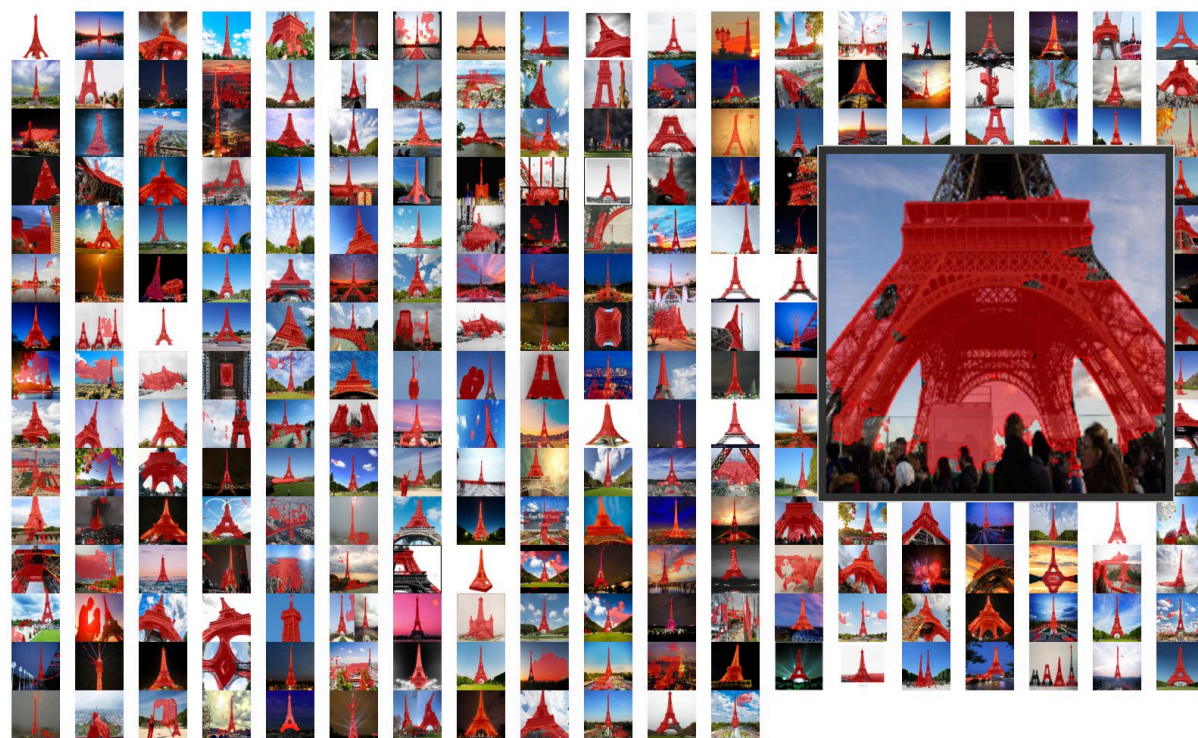

Supplement: Supplementary file 4 [file Li_FSS-1000_A_1000-Class_CVPR_2020_supplemental.zip]
