# Supplementary material
Source: ML conference proceedings conference paper supplement (https://openaccess.thecvf.com/content/CVPR_2020/html/Li_FSS-1000_A_1000-Class_CVPR_2020_paper.html)

# Boats

## Support

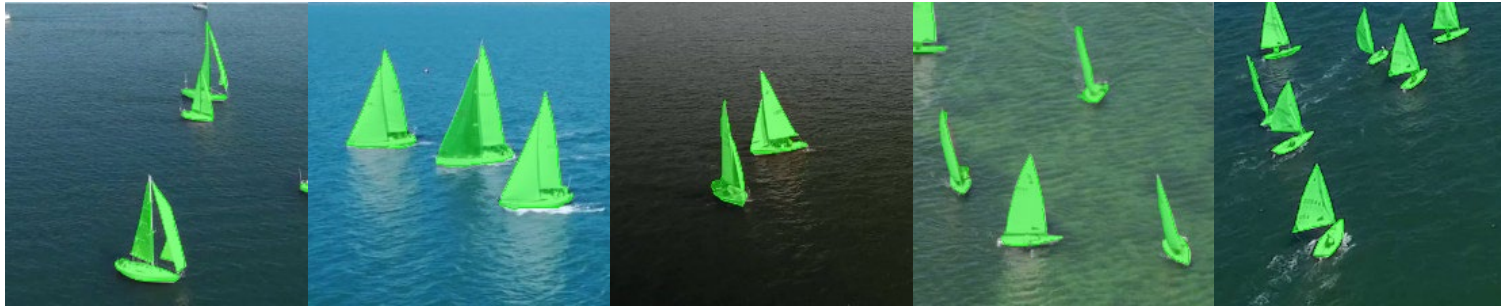

## Query

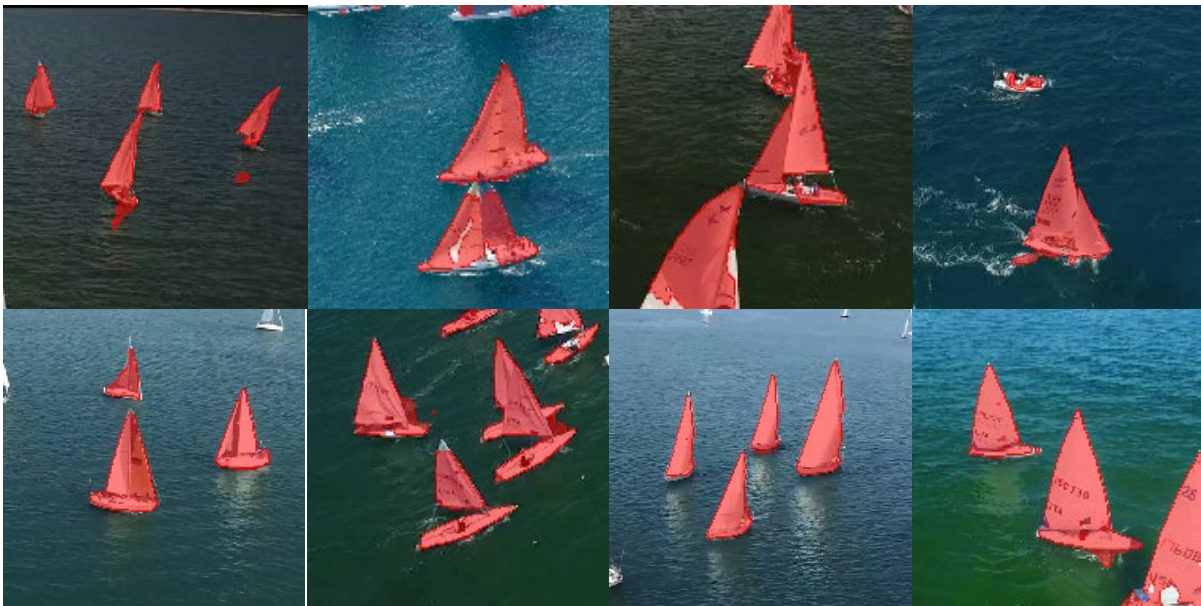

RacoonButterflyFish

Support

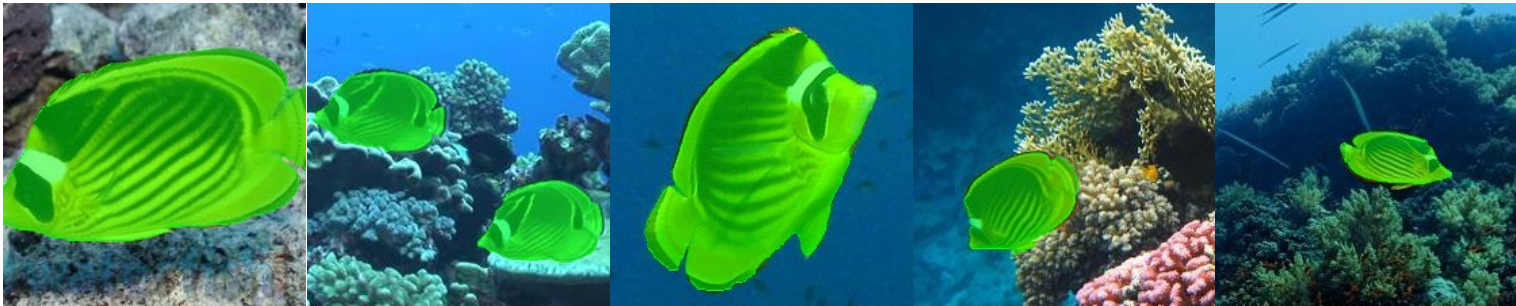

Query

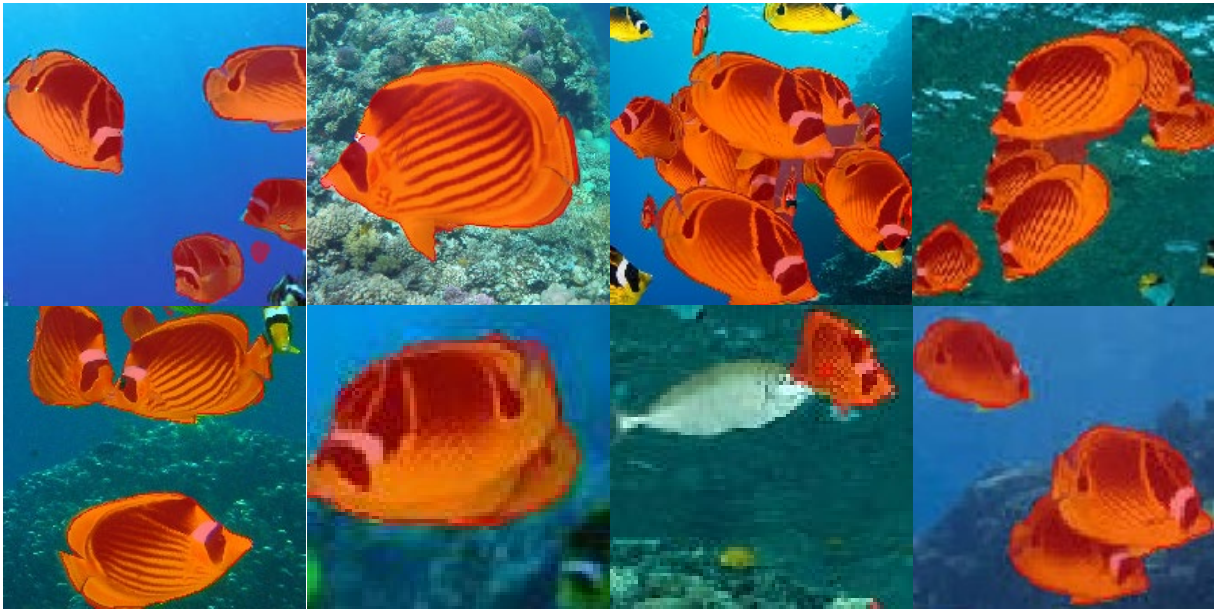

# Shrimp

## Support

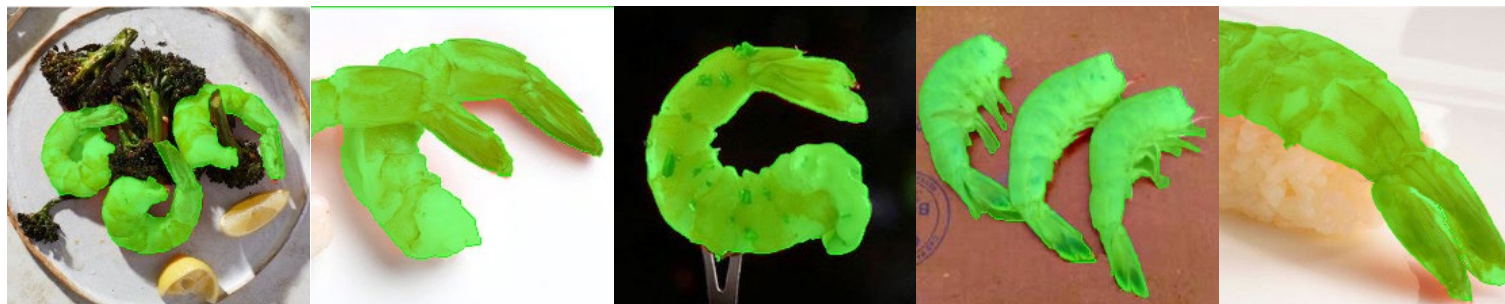

## Query

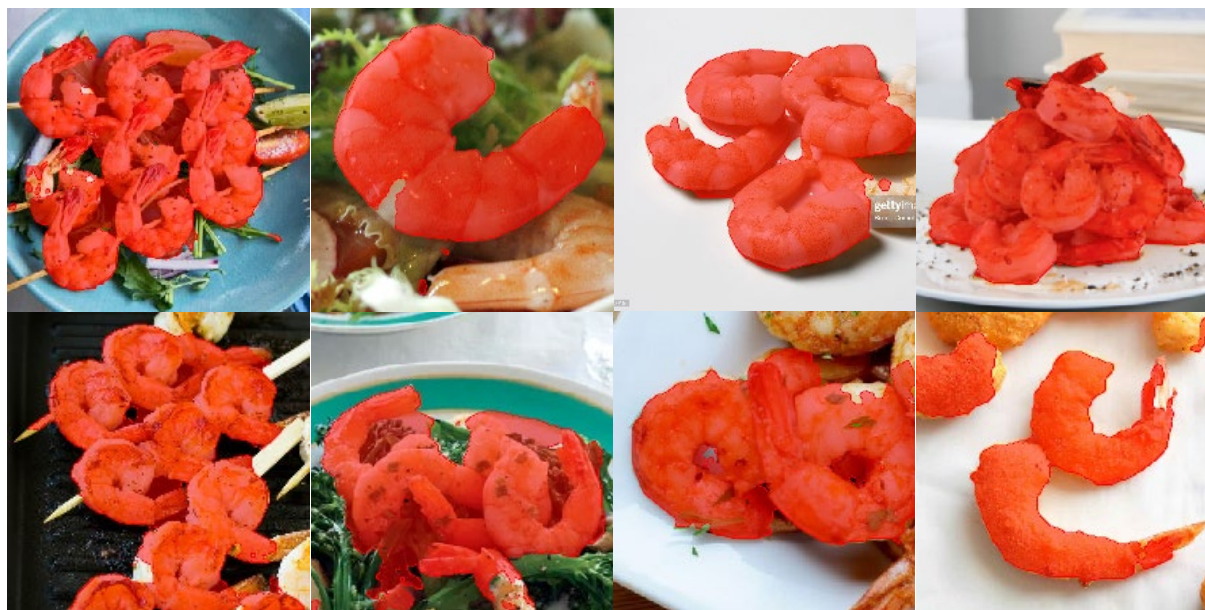

# Toadstool

## Support

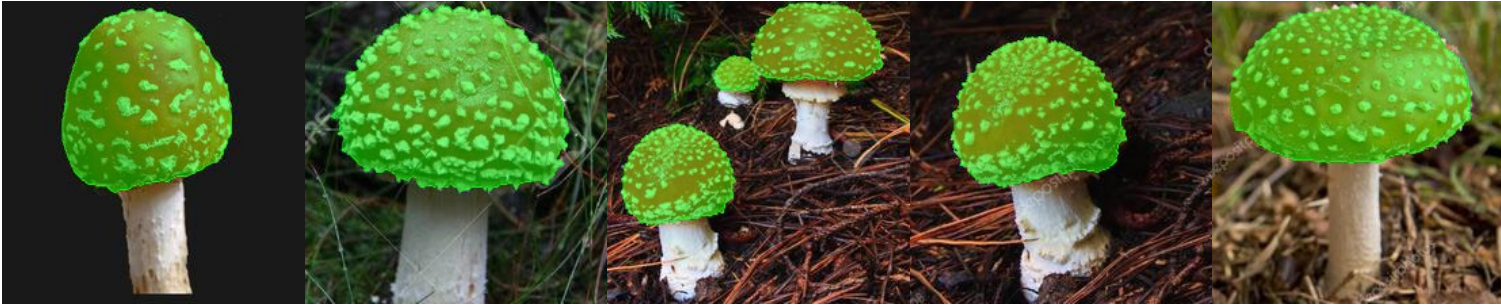

## Query

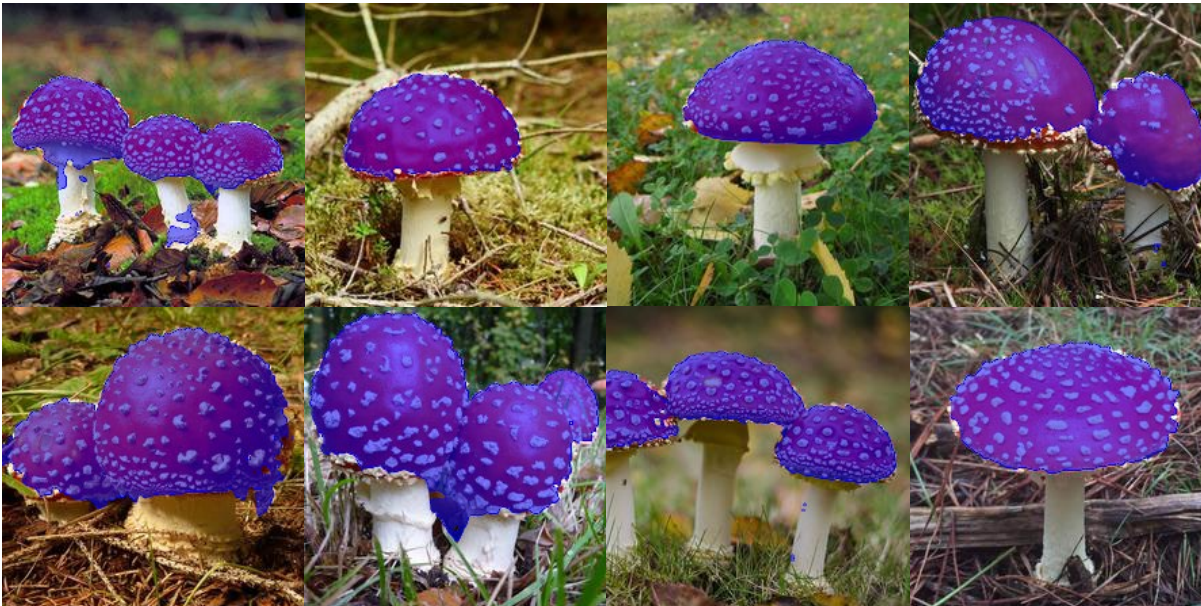

Supplement: Supplementary file 1 [file Li_FSS-1000_A_1000-Class_CVPR_2020_supplemental.zip]
