# Supplementary material
Source: ML conference proceedings conference paper supplement (https://openaccess.thecvf.com/content/CVPR_2020/html/Li_FSS-1000_A_1000-Class_CVPR_2020_paper.html)
Supplement: Supplementary file 2 [file Li_FSS-1000_A_1000-Class_CVPR_2020_supplemental.zip]

| No. | ImageNet | fsPASCAL | fsCOCO | FSS | FSS(test set) |
|-----|----------|----------|--------|-----|---------------|
| I   | ✓        | ✓        |        |     | 66.45%        |
| II  | ✓        |          | ✓      |     | 71.34%        |
| III | ✓        |          |        | ✓   | 79.30%        |
| IV  |          |          |        | ✓   | 80.12%        |
| V   |          | ✓        |        | ✓   | 81.97%        |
| VI  |          |          | ✓      | ✓   | 82.66%        |

Table 1. In Table 5 of the paper, models trained on ImageNet, FSS, and fsCOCO were compared and the test set results on FSS and fsCOCO were presented. Here we show more experiment settings that also include training on fsPASCAL, with their test results evaluated on the FSS test set. Similar to Table 5, All learning rates are initially set to  $10^{-4}$  except the models trained without using ImageNet pre-trained weights, which are set to  $10^{-3}$ .
