# Supplementary material
Source: ML conference proceedings conference paper supplement (https://openaccess.thecvf.com/content/CVPR_2020/html/Li_FSS-1000_A_1000-Class_CVPR_2020_paper.html)
Supplement: Supplementary file 3 [file Li_FSS-1000_A_1000-Class_CVPR_2020_supplemental.zip]

| class_name        | 2nd-level | 2nd-level | Top Level  | Top Level    |
|-------------------|-----------|-----------|------------|--------------|
| african_grey      | bird      |           | air_animal |              |
| bee_eater         | bird      |           | air_animal |              |
| bittern           | bird      |           | air_animal |              |
| black_grouse      | bird      |           | air_animal | water_animal |
| brambling         | bird      |           | air_animal |              |
| bushtit           | bird      |           | air_animal |              |
| coucal            | bird      |           | air_animal |              |
| cricket           | bird      |           | air_animal |              |
| cuckoo            | bird      |           | air_animal |              |
| curlew            | bird      |           | air_animal |              |
| dowitcher         | bird      |           | air_animal |              |
| fish_eagle        | bird      |           | air_animal |              |
| goldfinch         | bird      |           | air_animal |              |
| goloden_plover    | bird      |           | air_animal |              |
| hawk              | bird      |           | air_animal |              |
| hornet            | bird      |           | air_animal |              |
| housefinch        | bird      |           | air_animal |              |
| hummingbird       | bird      |           | air_animal |              |
| jacamar           | bird      |           | air_animal |              |
| jay_bird          | bird      |           | air_animal |              |
| lapwing           | bird      |           | air_animal |              |
| lark              | bird      |           | air_animal |              |
| little_blue_heron | bird      |           | air_animal |              |
| lorikeet          | bird      |           | air_animal |              |
| macaw             | bird      |           | air_animal |              |
| magpie_bird       | bird      |           | air_animal |              |
| may_bug           | bird      |           | air_animal |              |
| oriole            | bird      |           | air_animal |              |
| osprey            | bird      |           | air_animal |              |
| partridge         | bird      |           | air_animal |              |
| partridge         | bird      |           | air_animal |              |

|                         |      |            |              |
|-------------------------|------|------------|--------------|
| pheasant                | bird | air_animal |              |
| ptarmigan               | bird | air_animal | water_animal |
| quail                   | bird | air_animal |              |
| raven                   | bird | air_animal |              |
| skua                    | bird | air_animal | water_animal |
| sparrow                 | bird | air_animal | water_animal |
| spoonbill               | bird | air_animal | water_animal |
| starling                | bird | air_animal |              |
| stonechat               | bird | air_animal |              |
| stork                   | bird | air_animal |              |
| sulphur_crested         | bird | air_animal |              |
| thrush                  | bird | air_animal |              |
| toucan                  | bird | air_animal |              |
| vulture                 | bird | air_animal | water_animal |
| wagtail                 | bird | air_animal |              |
| wasp                    | bird | air_animal |              |
| white_stork             | bird | air_animal | water_animal |
| woodpecker              | bird | air_animal |              |
| Abe's_flyingfish        | fish | air_animal | water_animal |
| clearwing_flyingfish    | fish | air_animal | water_animal |
| glider_flyingfish       | fish | air_animal | water_animal |
| marginated_flyingfish   | fish | air_animal | water_animal |
| smallhead_flyingfish    | fish | air_animal | water_animal |
| stained_flyingfish      | fish | air_animal | water_animal |
| white-finned_flyingfish | fish | air_animal | water_animal |
| albatross               |      | air_animal |              |
| andean_condor           |      | air_animal |              |
| bald_eagle              |      | air_animal |              |
| bat                     |      | air_animal |              |
| bee                     |      | air_animal |              |
| black_stork             |      | air_animal |              |
| black_swan              |      | air_animal | water_animal |

|                    |            |              |
|--------------------|------------|--------------|
| bulbul_bird        | air_animal |              |
| bustard            | air_animal | water_animal |
| butterfly          | air_animal |              |
| cabbage_butterfly  | air_animal |              |
| chickadee_bird     | air_animal |              |
| cicada             | air_animal |              |
| condor             | air_animal |              |
| dragonfly          | air_animal |              |
| eagle              | air_animal |              |
| egret              | air_animal | water_animal |
| enchanted_eagle    | air_animal |              |
| falcon             | air_animal | water_animal |
| flamingo           | air_animal | water_animal |
| fly                | air_animal |              |
| flying_frog        | air_animal |              |
| flying_geckos      | air_animal |              |
| flying_snakes      | air_animal |              |
| flying_squirrel    | air_animal |              |
| gliding_lizard     | air_animal |              |
| gypsy_moth         | air_animal |              |
| hornbill           | air_animal |              |
| lacewing           | air_animal |              |
| ladybug            | air_animal |              |
| leafhopper         | air_animal |              |
| lycaenid_butterfly | air_animal |              |
| monarch_butterfly  | air_animal |              |
| owl                | air_animal |              |
| peacock            | air_animal | land_animal  |
| peregrine_falcon   | air_animal |              |
| peteropus          | air_animal |              |
| prairie_chicken    | air_animal | land_animal  |
| ringleet_butterfly | air_animal |              |

sulphur\_butterfly  
 wandering\_albatross  
 miniskirt  
 sock  
 apron  
 plate  
 teapot  
 ac\_ground  
 ac\_wall  
 bathtub  
 beer\_bottle  
 bra  
 carton  
 cassette  
 cd  
 ceiling\_fan  
 chopsticks  
 cigar  
 cigarette  
 cushion  
 diaper  
 earplug  
 face\_powder  
 feeder  
 folding\_chair  
 fork  
 garbage\_can  
 goblet  
 handkerchief  
 hotel\_slipper  
 mitten  
 moist\_proof\_pad

clothes  
clothes  
kitchen  
kitchen  
kitchen

|              |                   |
|--------------|-------------------|
| air_animal   |                   |
| air_animal   |                   |
| daily_object | misc              |
| daily_object |                   |
| daily_object |                   |
| daily_object |                   |
| daily_object | tool              |
| daily_object | electronic_device |
| daily_object | electronic_device |
| daily_object |                   |
| daily_object |                   |
| daily_object | misc              |
| daily_object | electronic_device |
| daily_object | tool              |
| daily_object | misc              |
| daily_object |                   |
| daily_object |                   |
| daily_object |                   |
| daily_object | tool              |
| daily_object | outdoor           |
| daily_object | tool              |
| daily_object | misc              |
| daily_object | misc              |
| daily_object | misc              |
| daily_object | music & sport     |

|                |              |                   |
|----------------|--------------|-------------------|
| paper_towel    | daily_object |                   |
| perfume        | daily_object |                   |
| pill_bottle    | daily_object |                   |
| pillow         | daily_object |                   |
| pinwheel       | daily_object | misc              |
| plastic_bag    | daily_object |                   |
| rain_barrel    | daily_object | outdoor           |
| rubber_eraser  | daily_object | tool              |
| ruler          | daily_object | tool              |
| running_shoe   | daily_object | music & sport     |
| saltshaker     | daily_object |                   |
| sandal         | daily_object |                   |
| shower_cap     | daily_object |                   |
| shower_curtain | daily_object |                   |
| sleeping_bag   | daily_object | music & sport     |
| soap           | daily_object |                   |
| soap_dispenser | daily_object |                   |
| soup_bowl      | daily_object |                   |
| space_heater   | daily_object | electronic_device |
| spatula        | daily_object | tool              |
| sponge         | daily_object | tool              |
| spoon          | daily_object | tool              |
| stool          | daily_object |                   |
| stove          | daily_object | electronic_device |
| strainer       | daily_object | tool              |
| sunglasses     | daily_object |                   |
| sunscreen      | daily_object | misc              |
| swab           | daily_object | tool              |
| table_calendar | daily_object | misc              |
| table_lamp     | daily_object | electronic_device |
| toilet_tissue  | daily_object |                   |
| toothpaste     | daily_object |                   |

|                       |         |                   |              |
|-----------------------|---------|-------------------|--------------|
| tray                  |         | daily_object      | misc         |
| vacuum_cup            |         | daily_object      |              |
| wall_clock            |         | daily_object      |              |
| wallet                |         | daily_object      | misc         |
| wardrobe              |         | daily_object      |              |
| wash_basin            |         | daily_object      |              |
| washer                |         | daily_object      |              |
| window_screen         |         | daily_object      |              |
| window_shade          |         | daily_object      |              |
| wine_bottle           |         | daily_object      |              |
| microwave             | kitchen | electronic_device | daily_object |
| toaster               | kitchen | electronic_device |              |
| waffle_iron           | kitchen | electronic_device |              |
| barber_shaver         |         | electronic_device |              |
| battery               |         | electronic_device | daily_object |
| computer_mouse        |         | electronic_device |              |
| conversion_plug       |         | electronic_device |              |
| cpu                   |         | electronic_device |              |
| crt_screen            |         | electronic_device |              |
| digital_clock         |         | electronic_device | daily_object |
| digital_watch         |         | electronic_device | daily_object |
| earphone1             |         | electronic_device |              |
| earphone2             |         | electronic_device |              |
| electric_fan          |         | electronic_device | daily_object |
| electronic_stove      |         | electronic_device |              |
| electronic_toothbrush |         | electronic_device | daily_object |
| electrical_switch     |         | electronic_device |              |
| espresso_maker        |         | electronic_device |              |
| hair_drier            |         | electronic_device |              |
| hard_disk             |         | electronic_device |              |
| ipad                  |         | electronic_device |              |
| iphone                |         | electronic_device |              |

|                 |                   |                |
|-----------------|-------------------|----------------|
| ipod            | electronic_device |                |
| ironing_board   | electronic_device |                |
| joystick        | electronic_device |                |
| keyboard        | electronic_device |                |
| laptop          | electronic_device |                |
| lawn_mower      | electronic_device | outdoor        |
| light_tube      | electronic_device |                |
| memory_stick    | electronic_device |                |
| microphone      | electronic_device |                |
| microsd         | electronic_device |                |
| mite_predator   | electronic_device |                |
| modem           | electronic_device |                |
| monitor         | electronic_device |                |
| nintendo_3ds    | electronic_device |                |
| nintendo_gba    | electronic_device |                |
| nintendo_sp     | electronic_device |                |
| nintendo_switch | electronic_device |                |
| nintendo_wiiu   | electronic_device |                |
| parking_meter   | electronic_device | outdoor        |
| pay_phone       | electronic_device | outdoor        |
| photocopier     | electronic_device |                |
| printer         | electronic_device |                |
| projector       | electronic_device |                |
| psp             | electronic_device |                |
| psngo           | electronic_device |                |
| quad_drone      | electronic_device | transportation |
| radiator        | electronic_device | daily_object   |
| radio           | electronic_device |                |
| radio_telescope | electronic_device |                |
| reflex_camera   | electronic_device |                |
| refrigerator    | electronic_device | daily_object   |
| remote_control  | electronic_device | daily_object   |

rice\_cooker  
smoothing\_iron  
soymilk\_machine  
speaker  
television  
usb  
vacuum  
water\_heater  
bagel  
brick\_tea  
carbonara  
cheese  
cheese\_burger  
chicken\_leg  
chicken\_wings  
chiffon\_cake  
cocacola  
consomme  
cornmeal  
cream  
crepe  
croissant  
dough  
doughnut  
egg  
egg\_tart  
eggnog  
espresso  
french\_fries  
guacamole  
hock  
hotdog

[illegible]



|                  |               |      |
|------------------|---------------|------|
| ice_lolly        | food          |      |
| icecream         | food          |      |
| ladyfinger       | food          |      |
| leaf_egg         | food          |      |
| marshmallow      | food          |      |
| meatloaf         | food          |      |
| melon_seed       | food          |      |
| mooncake         | food          |      |
| pepitas          | food          |      |
| pidan            | food          |      |
| pistachio        | food          |      |
| pizza            | food          |      |
| poached_egg      | food          |      |
| potato_chips     | food          |      |
| pretzel          | food          |      |
| pumpkin_pie      | food          |      |
| quail_egg        | food          |      |
| sandwich         | food          |      |
| sandwich_cookies | food          |      |
| steak            | food          |      |
| tofu             | food          |      |
| wafer            | food          |      |
| waffle           | food          |      |
| zongzi           | food          |      |
| sushi            | food          |      |
| shumai           | food          |      |
| har_gow          | food          |      |
| acorn            | fruit & plant |      |
| almond           | fruit & plant |      |
| anise            | fruit & plant |      |
| apple            | fruit & plant | food |
| artichoke        | fruit & plant |      |

|              |               |      |
|--------------|---------------|------|
| aubergine    | fruit & plant |      |
| avocado      | fruit & plant | food |
| banana       | fruit & plant | food |
| bell_pepper  | fruit & plant |      |
| bolete       | fruit & plant |      |
| brassicica   | fruit & plant |      |
| broccoli     | fruit & plant | food |
| cabbage      | fruit & plant | food |
| cactus       | fruit & plant |      |
| cactus_ball  | fruit & plant |      |
| camomile     | fruit & plant |      |
| carambola    | fruit & plant | food |
| cardoon      | fruit & plant |      |
| carrot       | fruit & plant |      |
| cauliflower  | fruit & plant |      |
| celery       | fruit & plant |      |
| cherry       | fruit & plant | food |
| chicory      | fruit & plant |      |
| chinese_date | fruit & plant |      |
| coconut      | fruit & plant |      |
| corn         | fruit & plant |      |
| cucumber     | fruit & plant |      |
| cumquat      | fruit & plant | food |
| daisy        | fruit & plant |      |
| downy_pitch  | fruit & plant | food |
| dwarf_beans  | fruit & plant |      |
| fig          | fruit & plant |      |
| garlic       | fruit & plant | food |
| ginger       | fruit & plant | food |
| gourd        | fruit & plant |      |
| gyromitra    | fruit & plant |      |
| hami_melon   | fruit & plant | food |

|                  |               |      |
|------------------|---------------|------|
| hawthorn         | fruit & plant | food |
| head_cabbage     | fruit & plant |      |
| hen_of_the_woods | fruit & plant |      |
| jackfruit        | fruit & plant | food |
| lady_slipper     | fruit & plant |      |
| leeks            | fruit & plant |      |
| lemon            | fruit & plant | food |
| lettuce          | fruit & plant |      |
| litchi           | fruit & plant | food |
| loguat           | fruit & plant | food |
| mango            | fruit & plant | food |
| mashed_potato    | fruit & plant |      |
| mooli            | fruit & plant |      |
| mushroom         | fruit & plant | food |
| narcissus        | fruit & plant |      |
| okra             | fruit & plant |      |
| olive            | fruit & plant |      |
| orange           | fruit & plant | food |
| papaya           | fruit & plant | food |
| peanut           | fruit & plant |      |
| pear             | fruit & plant | food |
| persimmon        | fruit & plant | food |
| pineapple        | fruit & plant | food |
| pinecone         | fruit & plant |      |
| pomegranate      | fruit & plant | food |
| pomelo           | fruit & plant | food |
| potato           | fruit & plant | food |
| potted_plant     | fruit & plant |      |
| pumpkin          | fruit & plant | food |
| red_bayberry     | fruit & plant | food |
| rose             | fruit & plant |      |
| rosehip          | fruit & plant | food |

|                        |       |               |              |
|------------------------|-------|---------------|--------------|
| spinach                |       | fruit & plant |              |
| stinkhorn              |       | fruit & plant |              |
| strawberry             |       | fruit & plant | food         |
| taro                   |       | fruit & plant |              |
| tomato                 |       | fruit & plant | food         |
| tulip                  |       | fruit & plant |              |
| walnut                 |       | fruit & plant |              |
| watermelon             |       | fruit & plant | food         |
| zucchini               |       | fruit & plant |              |
| fennel_bulb            |       | fruit & plant |              |
| beet_root              |       | fruit & plant |              |
| union                  |       | fruit & plant |              |
| lotus                  |       | fruit & plant |              |
| egyptian_cat           | cat   | land_animal   |              |
| manx                   | cat   | land_animal   |              |
| ocicat                 | cat   | land_animal   |              |
| persian_cat            | cat   | land_animal   |              |
| siamese_cat            | cat   | land_animal   |              |
| tebby_cat              | cat   | land_animal   |              |
| tiger_cat              | cat   | land_animal   |              |
| afghan_hound           | dog   | land_animal   |              |
| airedale               | dog   | land_animal   |              |
| american_staffordshire | dog   | land_animal   |              |
| australian_terrier     | dog   | land_animal   |              |
| basset                 | dog   | land_animal   |              |
| chihuahua              | dog   | land_animal   |              |
| whippet                | dog   | land_animal   |              |
| yorkshire_terrier      | dog   | land_animal   |              |
| boa_constrictor        | snake | land_animal   | water_animal |
| african_crocodile      |       | land_animal   | water_animal |
| african_elephant       |       | land_animal   |              |
| agama                  |       | land_animal   |              |

|                    |             |              |
|--------------------|-------------|--------------|
| american_alligator | land_animal |              |
| american_chameleon | land_animal |              |
| angora             | land_animal |              |
| arabian_camel      | land_animal |              |
| arctic_fox         | land_animal |              |
| armadillo          | land_animal |              |
| baboon             | land_animal |              |
| badger             | land_animal |              |
| banded_gecko       | land_animal |              |
| bear               | land_animal |              |
| beaver             | land_animal |              |
| bedlington_terrier | land_animal |              |
| bighorn_sheep      | land_animal |              |
| bison              | land_animal |              |
| black_bear         | land_animal |              |
| boston_bull        | land_animal |              |
| bradypod           | land_animal |              |
| brown_bear         | land_animal |              |
| camel              | land_animal |              |
| capuchin           | land_animal |              |
| cheetah            | land_animal |              |
| chicken            | land_animal | air_animal   |
| chimpanzee         | land_animal |              |
| colubus            | land_animal |              |
| common_newt        | land_animal |              |
| conch              | land_animal | water_animal |
| cottontail         | land_animal |              |
| cougar             | land_animal |              |
| coyote             | land_animal |              |
| dhole              | land_animal |              |
| dinosaur           | land_animal | water_animal |
| donkey             | land_animal |              |

|                 |             |
|-----------------|-------------|
| echidna         | land_animal |
| eft_newt        | land_animal |
| ferret          | land_animal |
| fox             | land_animal |
| fox_squirrel    | land_animal |
| gazelle         | land_animal |
| gecko           | land_animal |
| giant_panda     | land_animal |
| gibbon          | land_animal |
| gorilla         | land_animal |
| grasshopper     | land_animal |
| grey_fox        | land_animal |
| guinea_pig      | land_animal |
| hamster         | land_animal |
| hare            | land_animal |
| hartebeest      | land_animal |
| howler_monkey   | land_animal |
| hyena           | land_animal |
| ibex            | land_animal |
| impala          | land_animal |
| indian_elephant | land_animal |
| indri           | land_animal |
| kangaroo        | land_animal |
| kit_fox         | land_animal |
| koala           | land_animal |
| langur          | land_animal |
| lemur_catta     | land_animal |
| leopard         | land_animal |
| lesser_panda    | land_animal |
| lhasa_apso      | land_animal |
| lion            | land_animal |
| llama           | land_animal |

|                  |             |              |
|------------------|-------------|--------------|
| lynx             | land_animal |              |
| macaque          | land_animal |              |
| marmot           | land_animal |              |
| meerkat          | land_animal |              |
| mongoose         | land_animal |              |
| monkey           | land_animal |              |
| mouse            | land_animal |              |
| mule             | land_animal |              |
| orang            | land_animal |              |
| ostrich          | land_animal |              |
| ox               | land_animal |              |
| panda            | land_animal |              |
| panther          | land_animal |              |
| pig              | land_animal |              |
| polecat          | land_animal |              |
| proboscis        | land_animal |              |
| rabbit           | land_animal |              |
| raccoon          | land_animal |              |
| red_fox          | land_animal |              |
| red_wolf         | land_animal |              |
| scorpion         | land_animal | water_animal |
| siamang          | land_animal |              |
| skunk            | land_animal | water_animal |
| sloth_bear       | land_animal |              |
| snow_leopard     | land_animal |              |
| spider           | land_animal |              |
| spider_monkey    | land_animal |              |
| squirrel         | land_animal |              |
| squirrel_monkey  | land_animal |              |
| three-toed_sloth | land_animal |              |
| tiger            | land_animal |              |
| timber_wolf      | land_animal |              |

|                 |         |             |               |
|-----------------|---------|-------------|---------------|
| titi_monkey     |         | land_animal |               |
| wallaby         |         | land_animal |               |
| warthog         |         | land_animal |               |
| weasel          |         | land_animal |               |
| white_wolf      |         | land_animal |               |
| wild_boar       |         | land_animal |               |
| wolf            |         | land_animal |               |
| wombat          |         | land_animal |               |
| zebra           |         | land_animal |               |
| bolotie         | clothes | misc        |               |
| bowtie          | clothes | misc        |               |
| cowboy_hat      | clothes | misc        |               |
| fur_coat        | clothes | misc        |               |
| jean            | clothes | misc        |               |
| sweatshirt      | clothes | misc        |               |
| trench_coat     | clothes | misc        |               |
| windsor_tie     | clothes | misc        |               |
| witch_hat       | clothes | misc        |               |
| adidas_logo1    |         | misc        |               |
| adidas_logo2    |         | misc        |               |
| apple_icon      |         | misc        |               |
| armour          |         | misc        |               |
| assult_rifle    |         | misc        |               |
| baby            |         | misc        |               |
| backpack        |         | misc        | music & sport |
| balloon         |         | misc        |               |
| bamboo_slip     |         | misc        |               |
| baseball_player |         | misc        |               |
| bath_ball       |         | misc        |               |
| bed             |         | misc        | daily_object  |
| blossom_card    |         | misc        |               |
| bomb            |         | misc        |               |



bottle\_cap  
bracelet  
brick  
brick\_card  
buckler  
cannon  
car\_mirror  
car\_wheel  
chalk  
chalk\_brush  
chandelier  
chest  
children\_slide  
chinese\_knot  
christmas\_stocking  
coffin  
coin  
cradle  
crash\_helmet  
crayon  
diamond  
diver  
doormat  
envelope  
fan  
feather\_clothes  
file\_cabinet  
gas\_tank  
iron\_man  
jacko\_lantern  
jordan\_logo  
kappa\_logo

[illegible]

|                   |    |      |                   |
|-------------------|----|------|-------------------|
| kite              |    | misc | music & sport     |
| kobe_logo         |    | misc |                   |
| kunai             |    | misc |                   |
| lampshade         |    | misc |                   |
| leaf_fan          |    | misc |                   |
| leather_shoes     |    | misc |                   |
| leggings          |    | misc |                   |
| lipstick          |    | misc |                   |
| loafer            |    | misc |                   |
| maotai_bottle     |    | misc |                   |
| mario             |    | misc |                   |
| mcdonald_sign     |    | misc | outdoor           |
| mcdonald_uncle    |    | misc | outdoor           |
| military_vest     |    | misc |                   |
| missile           |    | misc | transportation    |
| mortar            |    | misc | transportation    |
| motarboard        |    | misc |                   |
| necklace          |    | misc |                   |
| net_surface_shoes |    | misc | music & sport     |
| nike_logo         |    | misc |                   |
| one-armed_bandit  |    | misc | electronic_device |
| paper_crane       |    | misc |                   |
| pearl             |    | misc |                   |
| pickelhaube       |    | misc |                   |
| poker             |    | misc |                   |
| pokemon_ball      |    | misc |                   |
| polo_shirt        |    | misc |                   |
| prayer_rug        |    | misc |                   |
| pubg_lvl3backpack | CG | misc |                   |
| pubg_lvl3helmet   | CG | misc |                   |
| puma_logo         |    | misc |                   |
| pyramid_cube      |    | misc |                   |

|               |    |                     |
|---------------|----|---------------------|
| pyraminx      |    | misc                |
| redheart      |    | misc                |
| revolver      |    | misc                |
| rubick_cube   |    | misc                |
| sarong        |    | misc                |
| scabbard      |    | misc                |
| seatbelt      |    | misc                |
| shopping_cart |    | misc transportation |
| shotgun       |    | misc                |
| shuriken      |    | misc                |
| skull         |    | misc                |
| sniper_rifle  |    | misc                |
| snowman       |    | misc outdoor        |
| sombrero      |    | misc                |
| spade         |    | misc                |
| spiderman     | CG | misc                |
| stole         |    | misc                |
| studio_couch  |    | misc daily_object   |
| suitcase      |    | misc daily_object   |
| teddy         |    | misc daily_object   |
| thor's_hammer |    | misc                |
| throne        |    | misc                |
| tobacco_pipe  |    | misc daily_object   |
| toilet_seat   |    | misc daily_object   |
| typewriter    |    | misc tool           |
| umbrella      |    | misc                |
| vase          |    | misc                |
| vestment      |    | misc                |
| victor_icon   |    | misc                |
| victor_logo   |    | misc                |
| vinyl         |    | misc                |
| wig           |    | misc                |

|                |            |               |
|----------------|------------|---------------|
| yonex_icon     |            | misc          |
| ski_mask       | clothes    | music & sport |
| balance_beam   | gym        | music & sport |
| barbell        | gym        | music & sport |
| dumbbell       | gym        | music & sport |
| punching_bag   | gym        | music & sport |
| treadmill      | gym        | music & sport |
| accordion      | instrument | music & sport |
| banjo          | instrument | music & sport |
| bassoon        | instrument | music & sport |
| bouzouki       | instrument | music & sport |
| cello          | instrument | music & sport |
| cornet         | instrument | music & sport |
| drum           | instrument | music & sport |
| drumstick      | instrument | music & sport |
| flute          | instrument | music & sport |
| guitar         | instrument | music & sport |
| harmonica      | instrument | music & sport |
| harp           | instrument | music & sport |
| kazoo          | instrument | music & sport |
| maraca         | instrument | music & sport |
| marimba        | instrument | music & sport |
| mouthpiece     | instrument | music & sport |
| ocarina        | instrument | music & sport |
| panpipe        | instrument | music & sport |
| piano_keyboard | instrument | music & sport |
| saxophone      | instrument | music & sport |
| shakuhachi     | instrument | music & sport |
| triumphal_arch | instrument | music & sport |
| upright_piano  | instrument | music & sport |
| violin         | instrument | music & sport |
| ab_wheel       |            | music & sport |



|                   |    |                   |
|-------------------|----|-------------------|
| water_polo        |    | music & sport     |
| chess_knight      |    | music & sport     |
| chess_bishop      |    | music & sport     |
| chess_queen       |    | music & sport     |
| chess_king        |    | music & sport     |
| beacon            |    | outdoor           |
| bee_house         |    | outdoor           |
| birdhouse         |    | outdoor           |
| cairn             |    | outdoor           |
| carousel          |    | outdoor           |
| church            |    | outdoor           |
| cloud             |    | outdoor           |
| comb              |    | outdoor           |
| drilling_platform |    | outdoor           |
| fire_hydrant      |    | outdoor           |
| fire_screen       |    | outdoor           |
| flowerpot         |    | outdoor           |
| fountain          |    | outdoor           |
| gas_pump          |    | outdoor           |
| iceberg           |    | outdoor           |
| igloo             |    | outdoor           |
| kwanyin           |    | outdoor           |
| mailbox           |    | outdoor           |
| manhole_cover     |    | outdoor           |
| mountain_tent     |    | outdoor           |
| obelisk           |    | outdoor           |
| park_bench        |    | outdoor           |
| pubg_airdrop      | CG | outdoor           |
| pyramid           |    | outdoor           |
| rocking_chair     |    | outdoor           |
| sandbar           |    | outdoor           |
| scarerow          |    | outdoor           |
|                   |    | tool              |
|                   |    | tool              |
|                   |    | electronic_device |
|                   |    | music & sport     |
|                   |    | misc              |
|                   |    | misc              |
|                   |    | misc              |

|                 |         |                   |
|-----------------|---------|-------------------|
| snowball        | outdoor |                   |
| solar_dish      | outdoor |                   |
| spring_scroll   | outdoor | misc              |
| staffordshire   | outdoor |                   |
| stop_sign       | outdoor | misc              |
| stupa           | outdoor |                   |
| sun             | outdoor |                   |
| sundial         | outdoor |                   |
| thatch          | outdoor |                   |
| tile_roof       | outdoor |                   |
| tomb            | outdoor |                   |
| torii           | outdoor |                   |
| totem_pole      | outdoor |                   |
| turnstile       | outdoor | electronic_device |
| vending_machine | outdoor | electronic_device |
| water_tower     | outdoor |                   |
| yurt            | outdoor |                   |
| statue_liberty  | outdoor |                   |
| big_ben         | outdoor |                   |
| great_wall      | outdoor |                   |
| kremlin         | outdoor |                   |
| tower_pisa      | outdoor |                   |
| taj_mahal       | outdoor |                   |
| windmill        | outdoor |                   |
| cristo_redentor | outdoor |                   |
| burj_al         | outdoor |                   |
| tokyo_tower     | outdoor |                   |
| canton_tower    | outdoor |                   |
| twin_towers     | outdoor |                   |
| parthenon       | outdoor |                   |
| little_mermaid  | outdoor |                   |
| sungnyemun      | outdoor |                   |

|                    |         |         |                   |
|--------------------|---------|---------|-------------------|
| geneva_chair       |         | outdoor |                   |
| samarra_mosque     |         | outdoor |                   |
| sydney_opera_house |         | outdoor |                   |
| villa_savoye       |         | outdoor |                   |
| cn_tower           |         | outdoor |                   |
| louvre_pyramid     |         | outdoor |                   |
| mount_fuji         |         | outdoor |                   |
| nagoya_castle      |         | outdoor |                   |
| cathedrale_paris   |         | outdoor |                   |
| stone_lion         |         | outdoor |                   |
| Buckingham_palace  |         | outdoor |                   |
| coffeepot          | kitchen | tool    |                   |
| cup                | kitchen | tool    | daily_object      |
| dishwasher         | kitchen | tool    | electronic_device |
| dutch_oven         | kitchen | tool    |                   |
| kitchen_knife      | kitchen | tool    | daily_object      |
| wok                | kitchen | tool    | daily_object      |
| wooden_spoon       | kitchen | tool    | daily_object      |
| abacus             |         | tool    |                   |
| adhensive_tape     |         | tool    |                   |
| arrow              |         | tool    |                   |
| ashtray            |         | tool    |                   |
| balance_weight     |         | tool    |                   |
| ballpoint          |         | tool    |                   |
| band-aid           |         | tool    |                   |
| barometer          |         | tool    |                   |
| beaker             |         | tool    |                   |
| beer_glass         |         | tool    |                   |
| bell               |         | tool    |                   |
| besom              |         | tool    | daily_object      |
| breast_pump        |         | tool    |                   |
| briefcase          |         | tool    |                   |



|                  |      |                   |
|------------------|------|-------------------|
| broom            | tool |                   |
| brush_pen        | tool |                   |
| bucket           | tool |                   |
| bulb             | tool | electronic_device |
| calculator       | tool | electronic_device |
| can_opener       | tool | daily_object      |
| candle           | tool | daily_object      |
| chainsaw         | tool | electronic_device |
| charge_battery   | tool | electronic_device |
| cleaver          | tool | daily_object      |
| cocktail_shaker  | tool |                   |
| coffee_mug       | tool |                   |
| collar           | tool |                   |
| combination_lock | tool |                   |
| cosmetic_brush   | tool |                   |
| esport_chair     | tool |                   |
| frying_pan       | tool |                   |
| globe            | tool | misc              |
| hair_razor       | tool |                   |
| hammer           | tool |                   |
| handcuff         | tool |                   |
| handshower       | tool | misc              |
| hatchet          | tool |                   |
| hook             | tool |                   |
| key              | tool | daily_object      |
| knife            | tool | daily_object      |
| ladder           | tool | daily_object      |
| ladle            | tool | daily_object      |
| letter_opener    | tool |                   |
| matchstick       | tool | misc              |
| measuring_cup    | tool |                   |
| medical_kit      | tool |                   |

microscope  
nail\_scissor  
neck\_brace  
oil\_filter  
oscilloscope  
paddle  
paint\_brush  
pen  
pencil\_box  
pencil\_sharpener1  
pencil\_sharpener2  
petri\_dish  
phonograph  
power\_drill  
quill\_pen  
razor  
reel  
scissors  
screw  
screwdriver  
scroll\_brush  
sewing\_machine  
shovel  
spark\_plug  
stapler  
stopwatch  
strongbox  
syringe  
tape\_player  
telescope  
thimble  
toilet\_brush

|      |                   |
|------|-------------------|
| tool |                   |
| tool | misc              |
| tool |                   |
| tool | electronic_device |
| tool |                   |
| tool | daily_object      |
| tool | daily_object      |
| tool |                   |
| tool |                   |
| tool |                   |
| tool |                   |
| tool | misc              |
| tool | electronic_device |
| tool | daily_object      |
| tool |                   |
| tool | outdoor           |
| tool |                   |
| tool |                   |
| tool | electronic_device |
| tool |                   |
| tool | electronic_device |
| tool |                   |
| tool | electronic_device |
| tool | daily_object      |
| tool |                   |
| tool | electronic_device |
| tool |                   |
| tool | electronic_device |
| tool | misc              |
| tool | misc              |
| tool |                   |

|                    |     |                |              |
|--------------------|-----|----------------|--------------|
| toilet_plunger     |     | tool           |              |
| toothbrush         |     | tool           |              |
| warehouse_tray     |     | tool           |              |
| whistle            |     | tool           | daily_object |
| wrench             |     | tool           |              |
| fire_engine        | car | transportation |              |
| garbage_truck      | car | transportation |              |
| muscle_car         | car | transportation |              |
| pickup             | car | transportation |              |
| police_car         | car | transportation |              |
| sports_car         | car | transportation |              |
| taxi               | car | transportation |              |
| tow_truck          | car | transportation |              |
| trailer_truck      | car | transportation |              |
| air_strip          |     | transportation |              |
| aircraft_carrier   |     | transportation |              |
| aircraft_lever     |     | transportation |              |
| airliner           |     | transportation |              |
| airship            |     | transportation |              |
| ambulance          |     | transportation |              |
| arch_bridge        |     | transportation | outdoor      |
| astronaut          |     | transportation |              |
| bamboo_dragonfly   |     | transportation |              |
| banana_boat        |     | transportation |              |
| beam_bridge        |     | transportation | outdoor      |
| bullet_train       |     | transportation |              |
| bus                |     | transportation |              |
| bicycle            |     | transportation |              |
| cablestayed_bridge |     | transportation | outdoor      |
| cableways          |     | transportation |              |
| canoe              |     | transportation |              |
| cantilever_bridge  |     | transportation | outdoor      |

carriage  
cart  
convertible  
conveyor  
crane  
delta\_wing  
doublebus  
excavator  
f1\_racing  
fire\_balloon  
forklift  
fueltank\_car  
golfcart  
hang\_glider  
harvester  
helicopter  
hover\_board  
jet\_aircraft  
jinrikisha  
lifeboat  
minicooper  
monocycle  
motor\_scooter  
motorbike  
paper\_plane  
raft  
rally\_car  
recreational\_vehicle  
rocket  
roller\_coaster  
santa\_sledge  
school\_bus

|                |               |
|----------------|---------------|
| transportation |               |
| transportation | music & sport |
| transportation |               |
| transportation |               |
| transportation | music & sport |
| transportation |               |
| transportation | music & sport |
| transportation |               |
| transportation | outdoor       |
| transportation |               |
| transportation |               |

schooner  
 scooter  
 shift\_gear  
 single\_log  
 sled  
 snowmobile  
 snowplow  
 space\_shuttle  
 speedboat  
 stealth\_aircraft  
 steam\_locomotive  
 steam\_train  
 steering\_wheel  
 streetcar  
 stretcher  
 submarine  
 tank  
 tiltrotor  
 torpedo  
 tractor  
 traffic\_light  
 transport\_helicopter  
 tresher  
 trimaran  
 trolleybus  
 truss\_bridge  
 tunnel  
 ufo  
 vespa  
 warplane  
 water\_bike  
 wheelchair

[illegible]

outdoor

music & sport

|                  |       |                |             |
|------------------|-------|----------------|-------------|
| wooden_boat      |       | transportation |             |
| wreck            |       | transportation |             |
| yawl             |       | transportation |             |
| redshank         | bird  | water_animal   | air_animal  |
| ruddy_turnstone  | bird  | water_animal   | air_animal  |
| ruffed_grouse    | bird  | water_animal   | air_animal  |
| water_ouzel      | bird  | water_animal   | air_animal  |
| anemone_fish     | fish  | water_animal   |             |
| carp             | fish  | water_animal   |             |
| coho             | fish  | water_animal   |             |
| goldfish         | fish  | water_animal   |             |
| haddock          | fish  | water_animal   |             |
| hammerhead_shark | fish  | water_animal   |             |
| killer_whale     | fish  | water_animal   |             |
| lionfish         | fish  | water_animal   |             |
| plaice           | fish  | water_animal   |             |
| rock_beauty      | fish  | water_animal   |             |
| sturgeon         | fish  | water_animal   |             |
| tiger_shark      | fish  | water_animal   |             |
| green_mamba      | snake | water_animal   | land_animal |
| indian_cobra     | snake | water_animal   | land_animal |
| rock_snake       | snake | water_animal   | land_animal |
| sidewinder       | snake | water_animal   | land_animal |
| vine_snake       | snake | water_animal   | land_animal |
| water_snake      | snake | water_animal   | land_animal |
| box_turtle       |       | water_animal   |             |
| brain_coral      |       | water_animal   |             |
| crab             |       | water_animal   |             |
| crocodile        |       | water_animal   |             |
| drake            |       | water_animal   | air_animal  |
| dugong           |       | water_animal   |             |
| eel              |       | water_animal   |             |
| fish             |       | water_animal   |             |

|                        |              |             |
|------------------------|--------------|-------------|
| flatworm               | water_animal |             |
| frog                   | water_animal |             |
| garfish                | water_animal |             |
| goose                  | water_animal |             |
| grey_whale             | water_animal |             |
| hippo                  | water_animal |             |
| iguana                 | water_animal |             |
| jellyfish              | water_animal |             |
| kinguin                | water_animal |             |
| leatherback_turtle     | water_animal |             |
| lobster                | water_animal |             |
| loggerhead_turtle      | water_animal |             |
| mink                   | water_animal |             |
| mud_turtle             | water_animal |             |
| nematode               | water_animal |             |
| night_snake            | water_animal |             |
| otter                  | water_animal |             |
| patas                  | water_animal |             |
| platypus               | water_animal |             |
| polar_bear             | water_animal | land_animal |
| porcupine              | water_animal | land_animal |
| pufferfish             | water_animal |             |
| red_breasted_merganser | water_animal | air_animal  |
| rhinoceros             | water_animal | land_animal |
| sea_cucumber           | water_animal |             |
| sea_urchin             | water_animal |             |
| seal                   | water_animal |             |
| snail                  | water_animal | land_animal |
| snake                  | water_animal | land_animal |
| spotted_salamander     | water_animal | land_animal |
| starfish               | water_animal |             |
| stingray               | water_animal |             |
| terrapiin_turtle       | water_animal |             |
| triceratops            | water_animal | land_animal |
| trilobite              | water_animal |             |

turtle  
water\_buffalo  
whale  
whiptail  
white\_shark

water\_animal  
water\_animal  
water\_animal  
water\_animal  
water\_animal

land\_animal  
  
land\_animal
