# Supplementary material
Source: ML conference proceedings conference paper supplement (https://openaccess.thecvf.com/content/CVPR_2020/html/Li_FSS-1000_A_1000-Class_CVPR_2020_paper.html)
Supplement: Supplementary file 5 [file Li_FSS-1000_A_1000-Class_CVPR_2020_supplemental.zip]

Support

Query

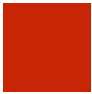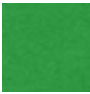

| Name          | Layer       | Output Size     |
|---------------|-------------|-----------------|
| Image & Label | Data        | 224 x 224 x 4   |
| Conv1-1       | 3x3 Conv    | 224 x 224 x 64  |
| Conv1-2       | 3x3 Conv    | 224 x 224 x 64  |
| Pool1         | Max Pooling | 112 x 112 x 64  |
| Conv2-1       | 3x3 Conv    | 112 x 112 x 128 |
| Conv2-2       | 3x3 Conv    | 112 x 112 x 128 |
| Pool2         | Max Pooling | 56 x 56 x 128   |
| Conv3-1       | 3x3 Conv    | 56 x 56 x 256   |
| Conv3-2       | 3x3 Conv    | 56 x 56 x 256   |
| Conv3-3       | 3x3 Conv    | 56 x 56 x 256   |
| Pool3         | Max Pooling | 28 x 28 x 256   |
| Conv4-1       | 3x3 Conv    | 28 x 28 x 512   |
| Conv4-2       | 3x3 Conv    | 28 x 28 x 512   |
| Conv4-3       | 3x3 Conv    | 28 x 28 x 512   |
| Pool4         | Max Pooling | 14 x 14 x 512   |
| Conv5-1       | 3x3 Conv    | 14 x 14 x 512   |
| Conv5-2       | 3x3 Conv    | 14 x 14 x 512   |
| Conv5-3       | 3x3 Conv    | 14 x 14 x 512   |
| Pool5         | Max Pooling | 7 x 7 x 512     |
| Concat SQ     | Concat      | 7 x 7 x 1024    |
| Relation1     | 1x1 Conv    | 7 x 7 x 512     |
| Relation2     | 1x1 Conv    | 7 x 7 x 512     |
| Upsample5-1   | NN-upsample | 14 x 14 x 512   |
| Concat5       | Concat      | 14 x 14 x 1024  |
| Upsample5-2   | 3x3 Conv    | 14 x 14 x 512   |
| Upsample4-1   | NN-upsample | 28 x 28 x 512   |
| Concat4       | Concat      | 28 x 28 x 1024  |
| Upsample4-2   | 3x3 Conv    | 28 x 28 x 256   |
| Upsample3-1   | NN-upsample | 56 x 56 x 256   |
| Concat3       | Concat      | 56 x 56 x 512   |
| Upsample3-2   | 3x3 Conv    | 56 x 56 x 128   |
| Upsample2-1   | NN-upsample | 112 x 112 x 128 |
| Concat2       | Concat      | 112 x 112 x 256 |
| Upsample2-2   | 3x3 Conv    | 112 x 112 x 64  |
| Upsample1-1   | NN-upsample | 224 x 224 x 64  |
| Concat1       | Concat      | 224 x 224 x 128 |
| Upsample1-2   | 3x3 Conv    | 224 x 224 x 64  |
| Conv_output   | 3x3 Conv    | 224 x 224 x 1   |

Encoder  
Module

Relation  
Module

Decoder  
Module
