# Supplementary material
Source: ML conference proceedings conference paper supplement (https://openaccess.thecvf.com/content/CVPR_2020/html/Li_FSS-1000_A_1000-Class_CVPR_2020_paper.html)
Supplement: Supplementary file 6 [file Li_FSS-1000_A_1000-Class_CVPR_2020_supplemental.zip]

Archive with 7 entries (6 files):
- 00575-supp/
- 00575-supp/FSS-1000_classes.pdf
- 00575-supp/hardcase_mining.pdf
- 00575-supp/more_experiments.pdf
- 00575-supp/multiple_instances.pdf
- 00575-supp/network_architecture.pdf
- 00575-supp/README.txt
